# Supplementary material for: The discovery of novel imidazo[1,2-a]pyridine derivatives as covalent anticancer agents
Source: Royal Society of Chemistry journal article supplement (doi:10.1039/d4ob00694a), 2024-01-01

## Electronic Supplementary Information (ESI)

### The discovery of novel imidazo[1,2-a]pyridine derivatives as covalent anticancer agents

Qin Song,<sup>[a]#</sup> Qianer Zhang,<sup>[a]#</sup> Xuejing Fan,<sup>[a]</sup> Fatmata Kayaat,<sup>[a]</sup> Ruicheng Lv,<sup>[a]</sup> Jing Li,<sup>\*[a]</sup> and Yong Wang<sup>\*[a]</sup>

<sup>[a]</sup> Key Laboratory of Marine Drugs, Chinese Ministry of Education; School of Medicine and Pharmacy, Ocean University of China, Qingdao 26003, Shandong, P. R. China; Laboratory for Marine Drugs and Bioproducts, Pilot National Laboratory for Marine Science and Technology, Qingdao 266200, P. R. China

# These two authors contributed equally

#### Table of contents

|                                                                            |         |
|----------------------------------------------------------------------------|---------|
| 1. Synthesis of compounds                                                  | S1-S7   |
| 2. <sup>1</sup> H and <sup>13</sup> C NMR spectra of compounds synthesized | S8-S24  |
| 3. MS and HRMS spectra of compounds synthesized                            | S25-S30 |
| 4. HPLC analysis for target compounds                                      | S31-S39 |
| 5. 2D docking model of I-11                                                | S40     |

## 1. Synthesis of compounds

1-(4-(3-(tert-butylamino)-2-(naphthalen-1-yl)imidazo[1,2-a]pyridin-8-yl)piperazin-1-yl)prop-2-en-1-one (**I-2**)

Following the synthetic method of **I-1**, compound **I-2** was obtained as a yellow solid in 56% yield. <sup>1</sup>H NMR (400 MHz, Chloroform-*d*) δ 8.03 (d, *J* = 7.5 Hz, 1H), 7.96 – 7.85 (m, 3H), 7.67 (dd, *J* = 7.0, 1.1 Hz, 1H), 7.55 (dd, *J* = 8.1, 7.1 Hz, 1H), 7.51 – 7.44 (m, 2H), 6.74 (t, *J* = 7.1 Hz, 1H), 6.60 (dd, *J* = 16.8, 10.5 Hz, 1H), 6.46 (d, *J* = 6.9 Hz, 1H), 6.31 (dd, *J* = 16.8, 1.9 Hz, 1H), 5.71 (dd, *J* = 10.5, 1.9 Hz, 1H), 4.01 – 3.88 (m, 2H), 3.85 – 3.76 (m, 2H), 3.72 – 3.65 (m, 2H), 3.51 (s, 2H), 0.74 (s, 9H). <sup>13</sup>C NMR (100 MHz, Chloroform-*d*) δ 165.38, 139.97, 137.52, 137.03, 133.82, 131.97, 128.51, 128.40, 128.21, 128.00, 127.40, 126.34, 125.69, 125.36, 117.70, 55.81, 50.13, 49.21, 45.88, 41.76, 29.74. ESI-LCMS (m/z): [M+H]<sup>+</sup> calculated for C<sub>28</sub>H<sub>32</sub>N<sub>5</sub>O 454.25; found 454.08.

1-(4-(3-(tert-butylamino)-2-(1*H*-indazol-7-yl)imidazo[1,2-a]pyridin-8-yl)piperazin-1-yl)prop-2-en-1-one (**I-3**)

Following the synthetic method of **I-1**, compound **I-3** was obtained as a yellow solid in 55% yield. <sup>1</sup>H NMR (400 MHz, Chloroform-*d*) δ 8.31 (s, 1H), 8.11 (s, 1H), 8.03 (d, *J* = 8.7 Hz, 1H), 7.93 (d, *J* = 6.7 Hz, 1H), 7.50 (d, *J* = 8.7 Hz, 1H), 6.69 (t, *J* = 7.1 Hz, 1H), 6.63 (dd, *J* = 16.8, 10.6 Hz, 1H), 6.41 (d, *J* = 7.3 Hz, 1H), 6.33 (dd, *J* = 16.8, 1.8 Hz, 1H), 5.73 (dd, *J* = 10.5, 1.8 Hz, 1H), 3.96 (s, 2H), 3.84 (s, 2H), 3.66 (s, 2H), 3.50 (s, 2H), 1.01 (s, 9H). <sup>13</sup>C NMR (100 MHz, Chloroform-*d*) δ 165.50, 139.90, 137.98, 137.31, 135.19, 128.11, 127.89, 127.45, 123.66, 120.25, 117.56, 111.49, 109.55, 55.18, 50.12, 49.28, 45.90, 41.81, 30.40. ESI-LCMS (m/z): [M+H]<sup>+</sup> calculated for C<sub>25</sub>H<sub>30</sub>N<sub>7</sub>O 444.24; found 444.08.

1-(4-(3-(tert-butylamino)-2-(2-fluoro-6-hydroxyphenyl)imidazo[1,2-a]pyridin-8-yl)piperazin-1-yl)prop-2-en-1-one (**I-4**)

Following the synthetic method of **I-1**, compound **I-4** was obtained as a yellow solid in 39% yield. <sup>1</sup>H NMR (400 MHz, Chloroform-*d*) δ 8.09 (d, *J* = 6.8 Hz, 1H), 7.23 – 7.14 (m, 1H), 6.89 – 6.82 (m, 1H), 6.77 (t, *J* = 7.1 Hz, 1H), 6.70 – 6.65 (m, 1H), 6.64 – 6.57 (m, 1H), 6.50 (d, *J* = 7.3 Hz, 1H), 6.34 (dd, *J* = 16.8, 1.8 Hz, 1H), 5.74 (dd, *J* = 10.5, 1.8 Hz, 1H), 3.96 (s, 2H), 3.84 (s, 2H), 3.57 (s, 2H), 3.40 (s, 2H), 1.00 (s, 9H). <sup>13</sup>C NMR (100 MHz, Chloroform-*d*) δ 165.14, 160.85, 157.42, 138.96, 136.42, 129.38 – 128.54 (m), 127.65, 127.12, 125.75, 117.69, 112.47, 112.17 – 111.48 (m),

108.29, 106.02 (d,  $J = 24.0$  Hz), 55.92, 49.76, 48.93, 45.52, 41.46, 29.32. ESI-LCMS (m/z):  $[M]^+$  calculated for  $C_{24}H_{28}FN_5O_2$  437.22; found 437.93.

1-(4-(3-((2,6-dimethylphenyl)amino)-2-(2-fluoro-6-hydroxyphenyl)imidazo[1,2-a]pyridin-8-yl)piperazin-1-yl)prop-2-en-1-one (**I-5**)

Following the synthetic method of **I-1**, compound **I-5** was obtained as a yellow solid in 41% yield.  $^1H$  NMR (400 MHz, Chloroform-*d*)  $\delta$  7.31 (d,  $J = 6.7$  Hz, 1H), 7.15 (q,  $J = 8.2$  Hz, 1H), 6.90 (d,  $J = 7.5$  Hz, 2H), 6.83 (d,  $J = 8.1$  Hz, 1H), 6.77 (t,  $J = 7.5$  Hz, 1H), 6.69 – 6.65 (m, 1H), 6.64 – 6.56 (m, 2H), 6.48 (d,  $J = 7.4$  Hz, 1H), 6.34 (dd,  $J = 16.8, 1.7$  Hz, 1H), 5.75 (dd,  $J = 10.5, 1.7$  Hz, 1H), 5.68 (d,  $J = 6.1$  Hz, 1H), 3.97 (s, 2H), 3.84 (s, 2H), 3.60 (s, 2H), 3.42 (s, 2H), 1.90 (s, 6H).  $^{13}C$  NMR (100 MHz, Chloroform-*d*)  $\delta$  165.61, 161.05, 158.62, 157.46, 139.64, 139.14, 135.46, 132.02, 129.66 (d,  $J = 11.7$  Hz), 129.57, 128.37, 127.26, 126.69, 123.82, 121.59, 116.34, 113.22, 112.60, 107.97, 106.57, 106.33, 50.09, 49.08, 45.89, 41.76, 18.32. ESI-LCMS (m/z):  $[M]^+$  calculated for  $C_{28}H_{28}FN_5O_2$  485.22; found 485.93.

Ethyl{[2-(6-fluoro-2-hydroxyphenyl)-8-[4-(1-oxoprop-2-enyl)piperazin-1-yl]imidazo[3,2-*a*]pyridin-3-yl]amino}acetate (**I-6**)

Following the synthetic method of **I-1**, compound **I-6** was obtained as a yellow solid in 49% yield.  $^1H$  NMR (400 MHz, Chloroform-*d*)  $\delta$  7.93 (d,  $J = 6.7$  Hz, 1H), 7.18 (q,  $J = 7.7$  Hz, 1H), 6.82 (dd,  $J = 11.0, 7.8$  Hz, 2H), 6.72 – 6.66 (m, 1H), 6.60 (dd,  $J = 16.7, 10.6$  Hz, 1H), 6.51 (d,  $J = 7.4$  Hz, 1H), 6.32 (d,  $J = 16.8$  Hz, 1H), 5.75 – 5.69 (m, 1H), 4.08 (q,  $J = 7.1$  Hz, 2H), 3.93 (s, 2H), 3.82 (s, 2H), 3.69 (d,  $J = 3.4$  Hz, 2H), 3.54 (s, 2H), 3.38 (s, 2H), 1.17 (t,  $J = 7.1$  Hz, 3H).  $^{13}C$  NMR (100 MHz, Chloroform-*d*)  $\delta$  170.87, 165.54, 139.55, 135.87, 129.62, 129.51 (d,  $J = 14.7$  Hz), 128.25, 127.32, 126.91, 116.81, 113.09, 113.06, 108.61, 106.45, 106.21, 61.24, 49.37, 49.12, 14.05. ESI-LCMS (m/z):  $[M+H]^+$  calculated for  $C_{24}H_{27}FN_5O_4$  468.20; found 468.17.

1-(4-(3-(tert-butylamino)-2-(2-fluoro-6-hydroxyphenyl)imidazo[1,2-a]pyridin-8-yl)piperazin-1-yl)-2-chloroethan-1-one (**I-7**)

Intermediate **9** (0.07 g, 0.14 mmol) was dissolved in anhydrous DCM, and then  $NaHCO_3$  (0.012 g, 0.14 mmol) was added as follows. The chloroacetyl chloride (23  $\mu$ L, 0.14 mmol) was added to the above system at low temperature. The mixture was stirred for 0.5 h. Pour the mixture into water (10 mL) and extract with ethyl acetate (10 mL  $\times$  3), the combined organic phase was

washed with water (10 mL × 3), dried over anhydrous Na<sub>2</sub>SO<sub>4</sub>, and concentrated under vacuum. Purification of the residue by flash column chromatography using DCM/MeOH as the gradient elution to afford compound **I-7** as a yellow solid in 50% yield. <sup>1</sup>H NMR (400 MHz, Chloroform-*d*) δ 8.12 (d, *J* = 6.7 Hz, 1H), 7.22 – 7.15 (m, 1H), 6.85 (d, *J* = 8.2 Hz, 1H), 6.79 (t, *J* = 7.1 Hz, 1H), 6.68 (dd, *J* = 11.2, 8.3 Hz, 1H), 6.54 (d, *J* = 7.3 Hz, 1H), 4.13 (s, 2H), 3.92 – 3.87 (m, 2H), 3.83 – 3.78 (m, 2H), 3.60 (s, 2H), 3.42 – 3.36 (m, 2H), 1.00 (s, 9H). <sup>13</sup>C NMR (100 MHz, Chloroform-*d*) δ 165.30, 158.79, 157.75, 139.12, 136.54, 129.56 (d, *J* = 11.7 Hz), 118.30, 112.95, 112.23, 106.59, 106.35, 56.42, 49.98, 49.14, 46.45, 42.04, 40.85, 29.71. ESI-LCMS (m/z): [M]<sup>+</sup> calculated for C<sub>23</sub>H<sub>27</sub>ClFN<sub>5</sub>O<sub>2</sub> 459.18; found 459.95.

1-(4-(3-(tert-butylamino)-2-(2-fluoro-6-hydroxyphenyl)imidazo[1,2-a]pyridin-8-yl)piperazin-1-yl)prop-2-yn-1-one (**I-8**)

Intermediate **9** (0.07 g, 0.14 mmol) was dissolved in anhydrous DCM and pre-cooled in an ice-water bath, then DIPEA (27 μL, 0.28 mmol) was added to another reaction vial. The HBTU (0.011 g, 0.03 mmol), and propargylate (8 μL, 0.12 mmol) was added dropwise slowly. After activation for 3 h, the mixture of incorporating propargylate was added dropwise into the pre-cooled reaction vial. The reaction was partitioned between DCM and water. The organic layer was separated, washed with water and brine, and concentrated in vacuo. Purification by flash column chromatography on silica gel using DCM/MeOH as the gradient elution to obtain **I-8** as a yellow solid in 43% yield. <sup>1</sup>H NMR (400 MHz, Chloroform-*d*) δ 8.11 (d, *J* = 6.4 Hz, 1H), 7.22 – 7.16 (m, 1H), 6.86 (d, *J* = 8.2 Hz, 1H), 6.78 (t, *J* = 7.1 Hz, 1H), 6.68 (dd, *J* = 11.5, 8.0 Hz, 1H), 6.52 (d, *J* = 7.2 Hz, 1H), 4.08 – 4.03 (m, 2H), 3.94 – 3.89 (m, 2H), 3.58 (s, 2H), 3.42 – 3.37 (m, 2H), 3.16 (s, 1H), 1.01 (s, 9H). <sup>13</sup>C NMR (100 MHz, Chloroform-*d*) δ 160.80, 157.33, 151.48, 138.76, 136.34, 129.39, 129.01 (d, *J* = 11.7 Hz), 117.78, 112.41, 111.81, 108.47, 105.95, 79.61, 74.84, 55.83, 49.59, 48.64, 46.56, 40.92, 29.52. ESI-LCMS (m/z): [M]<sup>+</sup> calculated for C<sub>24</sub>H<sub>26</sub>FN<sub>5</sub>O<sub>2</sub> 435.21; found 435.99.

1-(4-(3-(tert-butylamino)-2-(naphthalen-1-yl)imidazo[1,2-a]pyridin-8-yl)piperazin-1-yl)prop-2-yn-1-one (**I-9**)

Following the synthetic method of **I-8**, compound **I-9** was obtained as a pale green solid in 41% yield. <sup>1</sup>H NMR (400 MHz, Chloroform-*d*) δ 8.04 (d, *J* = 6.7 Hz, 1H), 7.97 – 7.89 (m, 2H), 7.88 (d, *J* = 8.2 Hz, 1H), 7.67 (d, *J* = 6.9 Hz, 1H), 7.57 – 7.53 (m, 1H), 7.51 – 7.45 (m, 2H), 6.74 (t, *J* = 7.1

Hz, 1H), 6.46 (d,  $J = 7.3$  Hz, 1H), 4.06 – 3.99 (m, 2H), 3.93 – 3.87 (m, 2H), 3.73 – 3.68 (m, 2H), 3.57 – 3.51 (m, 2H), 3.14 (s, 1H), 0.75 (s, 9H).  $^{13}\text{C}$  NMR (100 MHz, Chloroform-*d*)  $\delta$  151.81, 139.88, 137.56, 133.87, 132.01, 128.56, 128.42, 128.25, 126.38, 125.82, 125.72, 125.40, 117.89, 111.43, 79.44, 75.40, 55.87, 50.03, 49.07, 47.03, 41.39, 29.78. ESI-LCMS ( $m/z$ ):  $[\text{M}]^+$  calculated for  $\text{C}_{28}\text{H}_{29}\text{N}_5\text{O}$  451.24; found 451.99.

1-(4-(3-((2,6-dimethylphenyl)amino)-2-(2-fluoro-6-hydroxyphenyl)imidazo[1,2-*a*]pyridin-8-yl)piperazin-1-yl)prop-2-yn-1-one (**I-10**)

Following the synthetic method of **I-8**, compound **I-10** was obtained as a pale green solid in 53% yield.  $^1\text{H}$  NMR (400 MHz, Chloroform-*d*)  $\delta$  7.32 (d,  $J = 6.6$  Hz, 1H), 7.15 (q,  $J = 8.2$  Hz, 1H), 6.90 (d,  $J = 7.5$  Hz, 2H), 6.83 (d,  $J = 8.2$  Hz, 1H), 6.77 (t,  $J = 7.5$  Hz, 1H), 6.68 (t,  $J = 7.1$  Hz, 1H), 6.63 – 6.57 (m, 1H), 6.49 (d,  $J = 7.4$  Hz, 1H), 5.69 (d,  $J = 6.1$  Hz, 1H), 4.08 – 4.03 (m, 2H), 3.94 – 3.89 (m, 2H), 3.63 – 3.58 (m, 2H), 3.44 – 3.39 (m, 2H), 3.17 (s, 1H), 1.90 (s, 6H).  $^{13}\text{C}$  NMR (100 MHz, Chloroform-*d*)  $\delta$  158.60, 157.43, 151.91, 139.49, 139.09, 135.41, 129.68 (d,  $J = 11.6$  Hz), 129.56, 126.70, 123.88, 121.62, 116.52, 113.16, 112.60, 108.16, 106.57, 106.33, 79.69, 75.23, 50.00, 48.89, 46.98, 41.31, 29.70. ESI-LCMS ( $m/z$ ):  $[\text{M}]^+$  calculated for  $\text{C}_{28}\text{H}_{26}\text{FN}_5\text{O}_2$  483.21; found 483.74.

1-(4-(2-(2-fluoro-6-hydroxyphenyl)-3-((2-(trifluoromethyl)benzyl)amino)imidazo[1,2-*a*]pyridin-8-yl)piperazin-1-yl)prop-2-yn-1-one (**I-11**)

Following the synthetic method of **I-8**, compound **I-11** was obtained as a yellow solid in 50% yield.  $^1\text{H}$  NMR (400 MHz, Chloroform-*d*)  $\delta$  7.95 – 7.90 (m, 1H), 7.50 (d,  $J = 7.7$  Hz, 1H), 7.29 (t,  $J = 7.5$  Hz, 1H), 7.19 (t,  $J = 7.6$  Hz, 1H), 7.12 – 7.05 (m, 1H), 7.03 (d,  $J = 7.6$  Hz, 1H), 6.84 (t,  $J = 7.1$  Hz, 1H), 6.73 (d,  $J = 8.1$  Hz, 1H), 6.58 – 6.52 (m, 2H), 4.16 (s, 2H), 4.06 – 4.03 (m, 2H), 3.93 – 3.89 (m, 2H), 3.60 – 3.56 (m, 2H), 3.43 – 3.39 (m, 2H), 3.17 (s, 1H).  $^{13}\text{C}$  NMR (100 MHz, Chloroform-*d*)  $\delta$  160.57, 157.63, 151.93, 139.51, 136.71, 136.13, 131.63, 130.58, 129.30 (d,  $J = 11.9$  Hz), 127.68, 127.03, 125.95 (d,  $J = 5.6$  Hz), 116.70, 113.03, 112.78, 108.54, 106.28, 106.04, 79.67, 75.27, 50.00, 48.90, 47.02, 41.35, 29.72. ESI-HRMS ( $m/z$ ):  $[\text{M}+\text{H}]^+$  calculated for  $\text{C}_{28}\text{H}_{24}\text{F}_4\text{N}_5\text{O}_2$  538.1866; found 538.1861.

1-{8-[2-(6-fluoro-2-hydroxyphenyl)-3-({[2-(trifluoromethyl)phenyl]methyl}amino)imidazo[3,2-*a*]pyridin-8-yl]-3,8-diazabicyclo[3.2.1]octan-3-yl}prop-2-yn-1-one (**I-12**)

Following the synthetic method of **I-8**, compound **I-12** was obtained as a yellow solid in 43% yield. <sup>1</sup>H NMR (400 MHz, Chloroform-*d*) δ 7.91 (d, *J* = 7.4 Hz, 1H), 7.51 (d, *J* = 7.7 Hz, 1H), 7.31 (t, *J* = 7.6 Hz, 1H), 7.21 (t, *J* = 7.7 Hz, 1H), 7.09 (q, *J* = 8.3, 7.5 Hz, 2H), 6.84 – 6.79 (m, 1H), 6.74 (d, *J* = 8.0 Hz, 1H), 6.55 (dd, *J* = 11.9, 8.8 Hz, 1H), 6.46 (d, *J* = 7.3 Hz, 1H), 4.86 (d, *J* = 6.5 Hz, 1H), 4.68 (d, *J* = 5.3 Hz, 1H), 4.32 (d, *J* = 11.3 Hz, 1H), 4.18 – 4.09 (m, 2H), 3.81 (d, *J* = 13.0 Hz, 1H), 3.14 (d, *J* = 10.3 Hz, 1H), 3.06 (d, *J* = 13.5 Hz, 2H), 2.33 – 2.26 (m, 1H), 2.23 – 2.12 (m, 2H), 2.11 – 2.04 (m, 1H). <sup>13</sup>C NMR (100 MHz, Chloroform-*d*) δ 160.58, 158.16, 157.62, 148.71, 139.66, 136.86, 136.74, 136.16, 131.65, 130.56, 129.28 (d, *J* = 11.9 Hz), 127.68, 127.02, 125.97 (d, *J* = 5.7 Hz), 116.25, 113.11, 112.71, 108.40, 106.33, 106.10, 77.26, 75.97, 56.92, 55.95, 54.33, 51.96, 48.70, 27.81, 27.27. ESI-LCMS (m/z): [M]<sup>+</sup> calculated for C<sub>30</sub>H<sub>25</sub>F<sub>4</sub>N<sub>5</sub>O<sub>2</sub> 563.19; found 563.75.

1-{7-[2-(6-fluoro-2-hydroxyphenyl)-3-({[2-(trifluoromethyl)phenyl]methyl}amino)imidazo[3,2-*a*]pyridin-8-yl]-2,7-diazaspiro[3.5]nonan-2-yl}prop-2-yn-1-one (**I-13**)

Following the synthetic method of **I-8**, compound **I-13** was obtained as a yellow solid in 48% yield. <sup>1</sup>H NMR (400 MHz, Chloroform-*d*) δ 7.89 (d, *J* = 6.6 Hz, 1H), 7.51 (d, *J* = 7.8 Hz, 1H), 7.30 (t, *J* = 7.3 Hz, 1H), 7.20 (t, *J* = 7.7 Hz, 1H), 7.12 – 7.02 (m, 2H), 6.81 (t, *J* = 7.1 Hz, 1H), 6.74 (d, *J* = 8.2 Hz, 1H), 6.54 (dd, *J* = 11.2, 8.2 Hz, 2H), 4.16 (d, *J* = 4.7 Hz, 2H), 3.99 (s, 2H), 3.84 (s, 2H), 3.48 – 3.42 (m, 2H), 3.37 (dt, *J* = 11.9, 5.3 Hz, 2H), 3.00 (s, 1H), 2.05 (t, *J* = 5.4 Hz, 4H). <sup>13</sup>C NMR (100 MHz, Chloroform-*d*) δ 158.17, 157.83, 153.28, 140.24, 136.81, 136.27, 131.61, 130.55, 129.15 (d, *J* = 12.0 Hz), 127.63, 126.86, 125.93 (d, *J* = 5.6 Hz), 116.08, 113.10, 112.80, 108.29, 106.18, 105.94, 77.86, 74.77, 60.29, 57.91, 46.81, 35.25, 34.38, 29.71. ESI-LCMS (m/z): [M+H]<sup>+</sup> calculated for C<sub>31</sub>H<sub>28</sub>F<sub>4</sub>N<sub>5</sub>O<sub>2</sub> 578.21; found 578.83.

1-(4-(2-(2-fluoro-6-hydroxyphenyl)-3-((4-isopropylbenzyl)amino)imidazo[1,2-*a*]pyridin-6-yl)piperazin-1-yl)prop-2-yn-1-one (**I-14**)

Following the synthetic method of **I-8**, compound **I-14** was obtained as a reddish brown solid in 33% yield. <sup>1</sup>H NMR (400 MHz, Chloroform-*d*) δ 7.56 (s, 1H), 7.44 (d, *J* = 9.6 Hz, 1H), 7.15 – 7.06 (m, 6H), 6.81 (d, *J* = 8.2 Hz, 1H), 6.65 – 6.58 (m, 1H), 3.96 (d, *J* = 10.3 Hz, 4H), 3.83 (s, 2H), 3.19 (s, 1H), 3.05 (d, *J* = 18.4 Hz, 4H), 2.88 – 2.81 (m, 1H), 1.20 (d, *J* = 6.8 Hz, 6H). <sup>13</sup>C NMR (100 MHz, Chloroform-*d*) δ 165.15, 148.46, 139.20, 136.64, 128.38, 126.80, 126.29, 125.96, 121.85 (d, *J* = 30.6 Hz), 116.39, 108.98, 79.81, 75.11, 50.65, 49.93, 46.07, 41.84, 40.77, 33.75, 24.02. ESI-

LCMS (m/z): [M]<sup>+</sup> calculated for C<sub>30</sub>H<sub>30</sub>FN<sub>5</sub>O<sub>2</sub> 511.24; found 511.90.

1-(4-(3-((4-isopropylbenzyl)amino)-2-(thiophen-2-yl)imidazo[1,2-a]pyridin-6-yl)piperazin-1-yl)prop-2-yn-1-one (**I-15**)

Following the synthetic method of **I-8**, compound **I-15** was obtained as a yellow solid in 42% yield. <sup>1</sup>H NMR (400 MHz, Chloroform-*d*) δ 7.73 (d, *J* = 2.2 Hz, 1H), 7.67 (d, *J* = 5.0 Hz, 1H), 7.44 (d, *J* = 9.6 Hz, 1H), 7.39 (dd, *J* = 4.9, 2.9 Hz, 1H), 7.27 (s, 1H), 7.23 (d, *J* = 8.1 Hz, 2H), 7.18 (d, *J* = 8.1 Hz, 2H), 6.96 (dd, *J* = 9.6, 1.9 Hz, 1H), 4.16 (s, 2H), 3.95 – 3.89 (m, 2H), 3.82 – 3.77 (m, 2H), 3.19 (s, 1H), 3.00 – 2.95 (m, 2H), 2.93 – 2.90 (m, 2H), 2.90 – 2.85 (m, 1H), 1.23 (d, *J* = 6.9 Hz, 6H). <sup>13</sup>C NMR (100 MHz, Chloroform-*d*) δ 165.51, 136.80, 128.63, 128.52, 127.25, 126.97, 126.39, 126.06, 125.96, 109.02, 52.40, 51.05, 50.22, 45.68, 33.91, 24.16. ESI-LCMS (m/z): [M+H]<sup>+</sup> calculated for C<sub>28</sub>H<sub>30</sub>N<sub>5</sub>OS 484.21; found 484.01.

1-(4-(2-(2-hydroxynaphthalen-1-yl)-3-((4-isopropylbenzyl)amino)imidazo[1,2-a]pyridin-6-yl)piperazin-1-yl)prop-2-yn-1-one (**I-16**)

Following the synthetic method of **I-8**, compound **I-16** was obtained as a yellow solid in 36% yield. <sup>1</sup>H NMR (400 MHz, Chloroform-*d*) δ 7.81 (d, *J* = 8.0 Hz, 1H), 7.75 – 7.69 (m, 2H), 7.52 (s, 1H), 7.46 (t, *J* = 9.2 Hz, 2H), 7.33 (t, *J* = 7.4 Hz, 1H), 7.23 (d, *J* = 8.8 Hz, 1H), 7.07 (d, *J* = 11.6 Hz, 1H), 6.93 (d, *J* = 8.0 Hz, 2H), 6.75 (d, *J* = 8.0 Hz, 2H), 3.98 – 3.92 (m, 2H), 3.85 – 3.80 (m, 2H), 3.68 (s, 2H), 3.20 (s, 1H), 3.04 (dt, *J* = 20.7, 4.9 Hz, 4H), 2.80 (s, 1H), 2.79 – 2.73 (m, 1H), 1.16 (d, *J* = 6.9 Hz, 6H). <sup>13</sup>C NMR (100 MHz, Chloroform-*d*) δ 154.04, 139.40, 135.97, 130.19, 128.77, 127.87, 126.93, 126.37, 123.48, 123.00, 118.84, 116.78, 109.27, 79.84, 51.74, 51.00, 50.22, 46.69, 41.24, 33.63, 29.71, 23.93. ESI-LCMS (m/z): [M+H]<sup>+</sup> calculated for C<sub>34</sub>H<sub>34</sub>N<sub>5</sub>O<sub>2</sub> 544.26; found 544.06.

1-(4-(3-(tert-butylamino)-2-(thiophen-2-yl)imidazo[1,2-a]pyridin-6-yl)piperazin-1-yl)prop-2-yn-1-one (**I-17**)

Following the synthetic method of **I-8**, compound **I-17** was obtained as a yellow solid in 40% yield. <sup>1</sup>H NMR (400 MHz, Chloroform-*d*) δ 7.75 (s, 1H), 7.68 (s, 1H), 7.64 (d, *J* = 4.6 Hz, 1H), 7.46 (d, *J* = 9.5 Hz, 1H), 7.35 (s, 1H), 7.01 (d, *J* = 9.4 Hz, 1H), 3.97 (s, 2H), 3.84 (s, 2H), 3.18 (s, 1H), 3.12 (s, 2H), 3.06 (s, 2H), 1.11 (s, 9H). <sup>13</sup>C NMR (100 MHz, Chloroform-*d*) δ 138.83, 127.19, 125.33, 123.82, 122.59, 121.83, 116.91, 110.50, 79.75, 56.51, 51.22, 50.41, 46.80, 41.32, 30.57.

ESI-LCMS (m/z): [M+H]<sup>+</sup> calculated for C<sub>22</sub>H<sub>26</sub>N<sub>5</sub>OS 408.18; found 407.85.



## 2. <sup>1</sup>H and <sup>13</sup>C NMR spectra of compound I-1 ~ 17

<sup>1</sup>H NMR spectrum of compound I-1 (400 MHz, Chloroform-*d*)

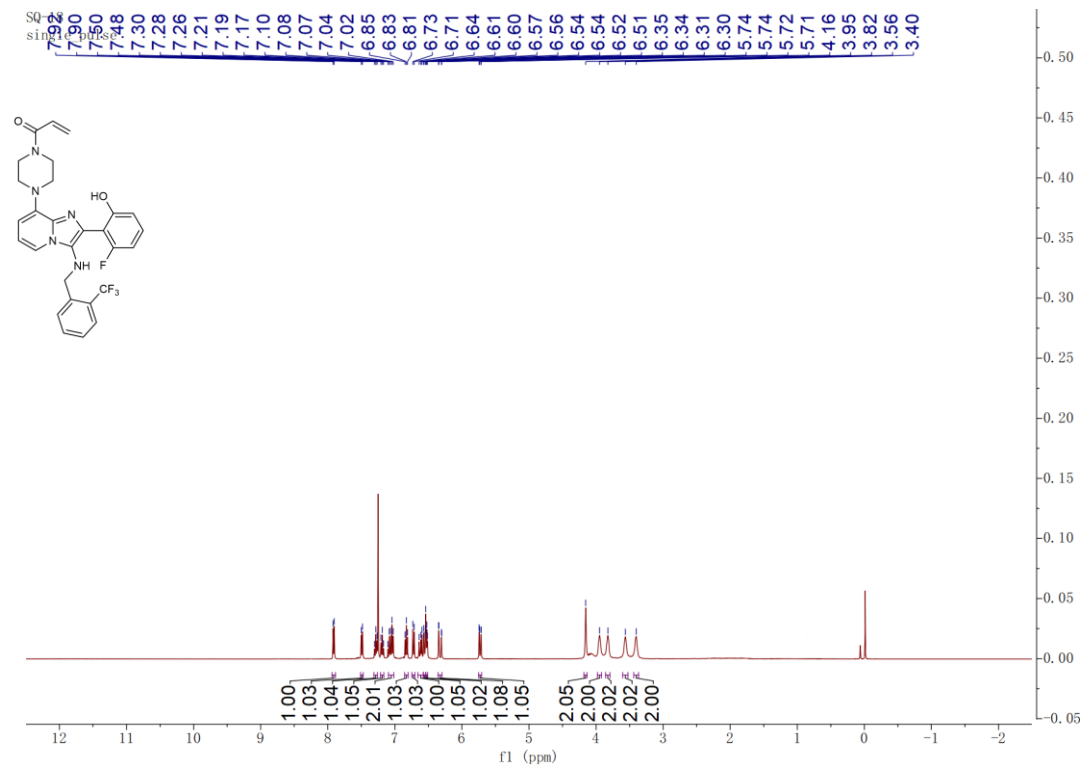

<sup>13</sup>C NMR spectrum of compound I-1 (100 MHz, Chloroform-*d*)

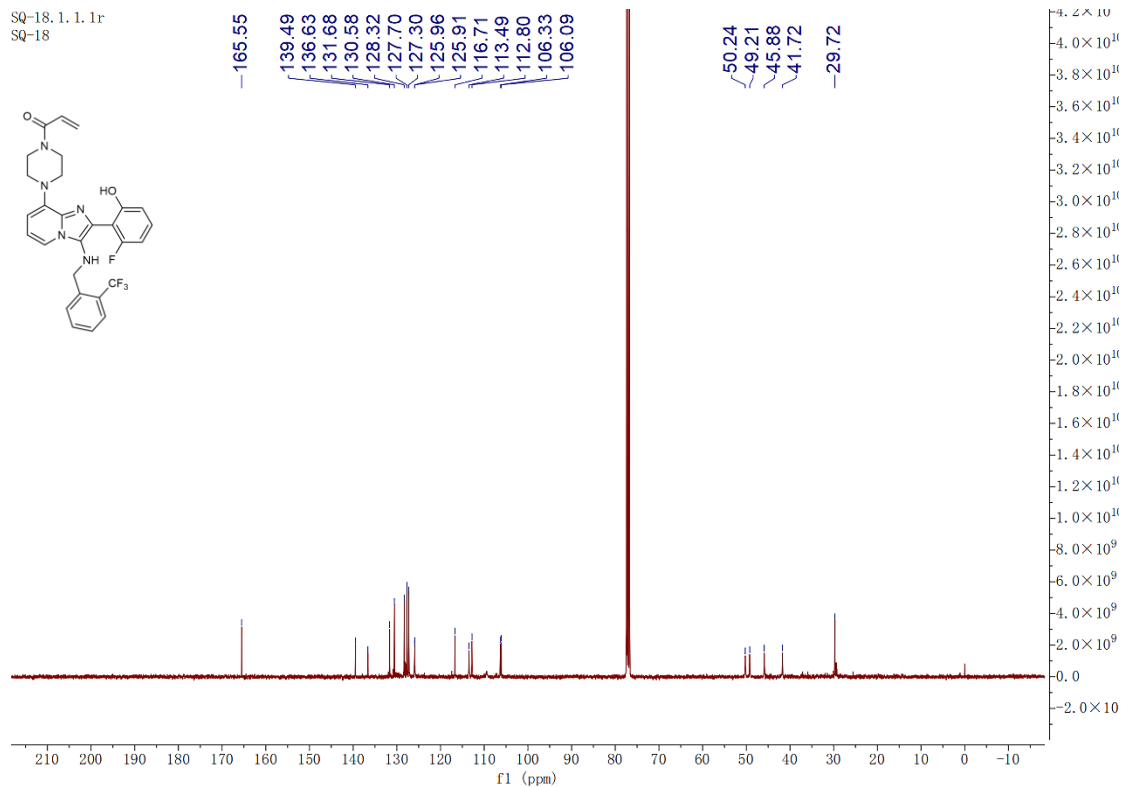

<sup>1</sup>H NMR spectrum of compound I-2 (400 MHz, Chloroform-*d*)

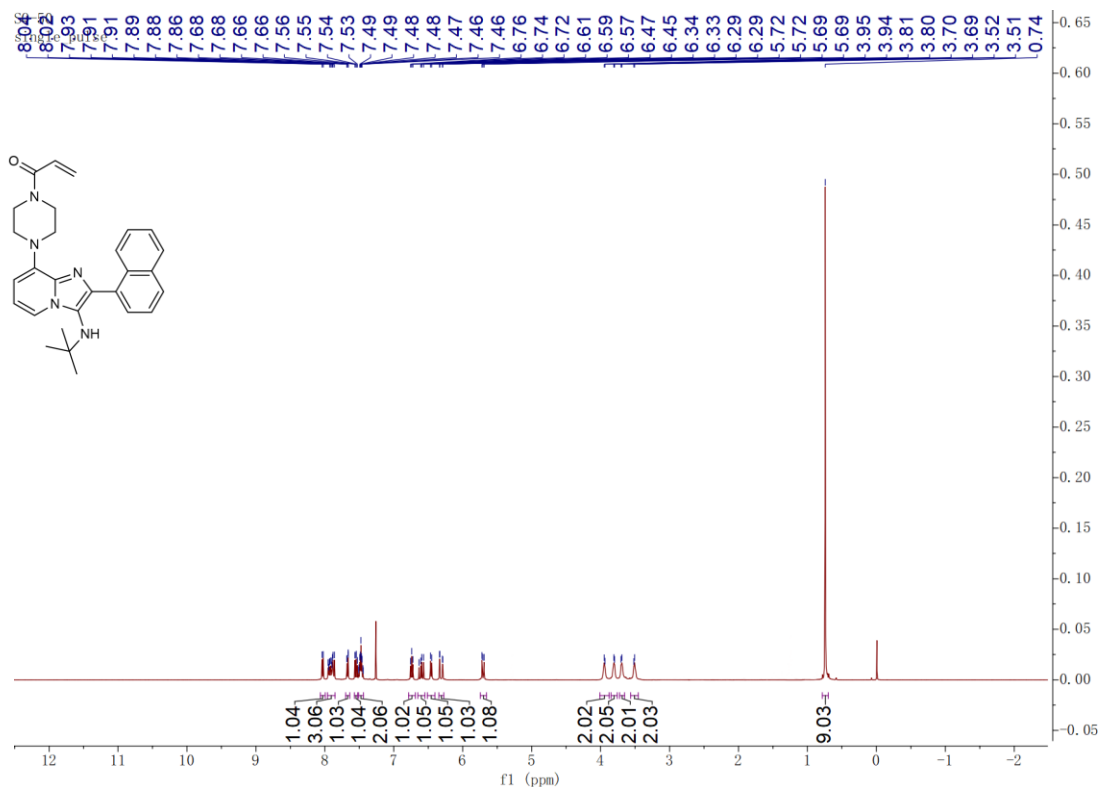

<sup>13</sup>C NMR spectrum of compound I-2 (100 MHz, Chloroform-*d*)

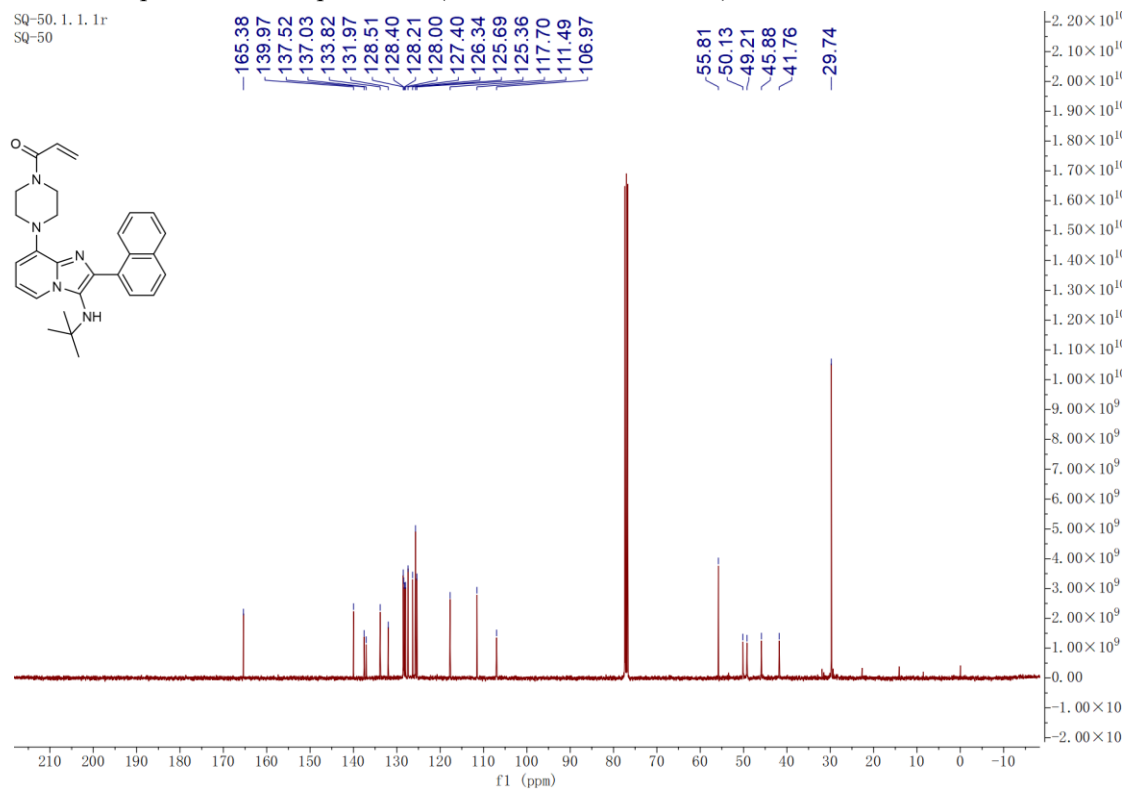

<sup>1</sup>H NMR spectrum of compound I-3 (400 MHz, Chloroform-*d*)

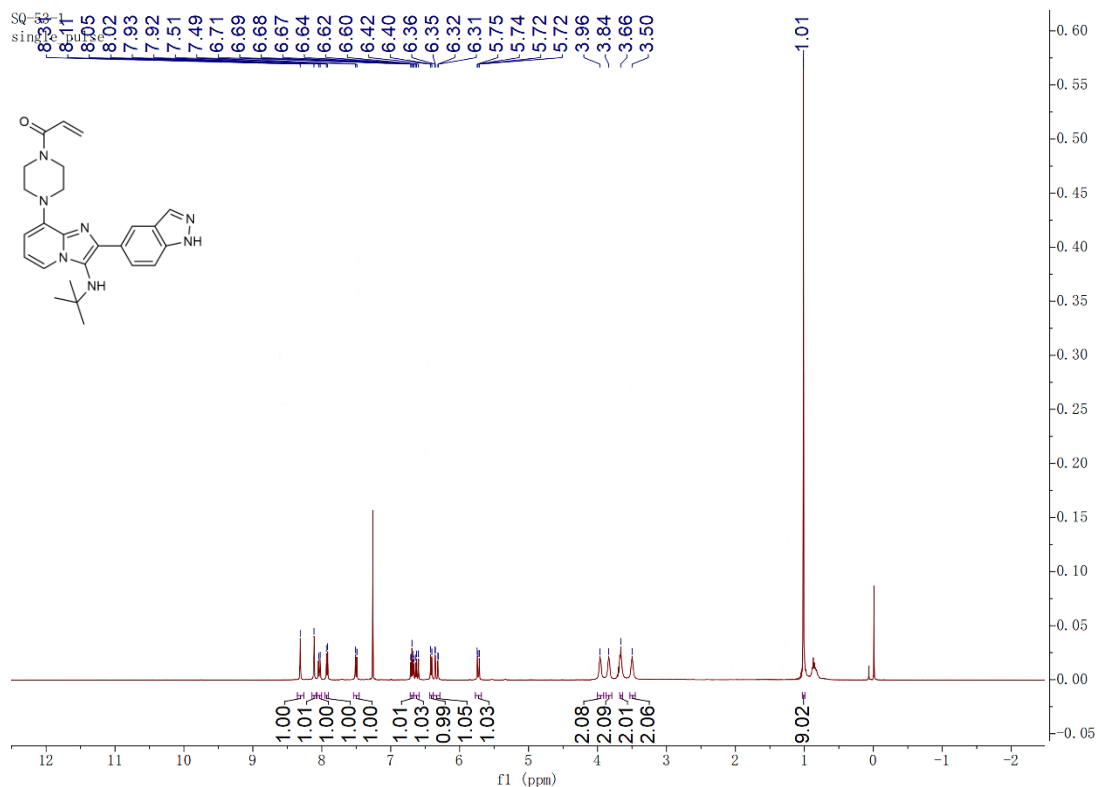

<sup>13</sup>C NMR spectrum of compound I-3 (100 MHz, Chloroform-*d*)

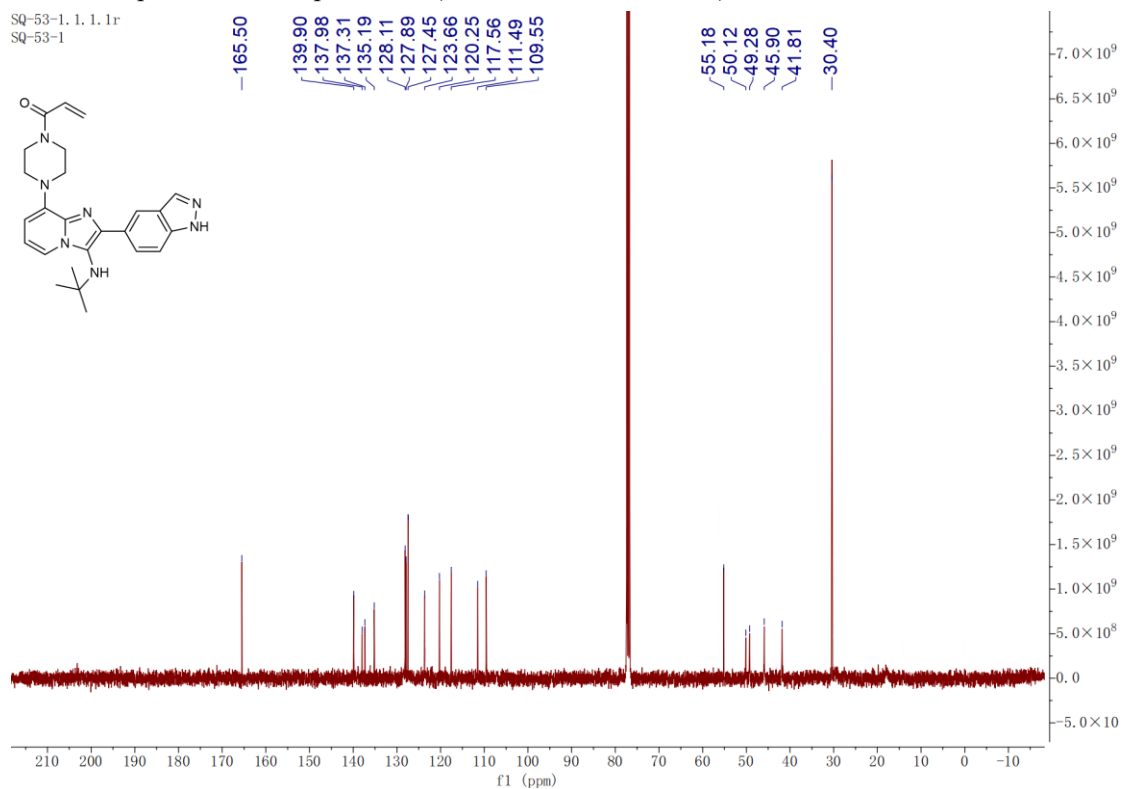

<sup>1</sup>H NMR spectrum of compound I-4 (400 MHz, Chloroform-*d*)

SQ-43  
single\_pulse

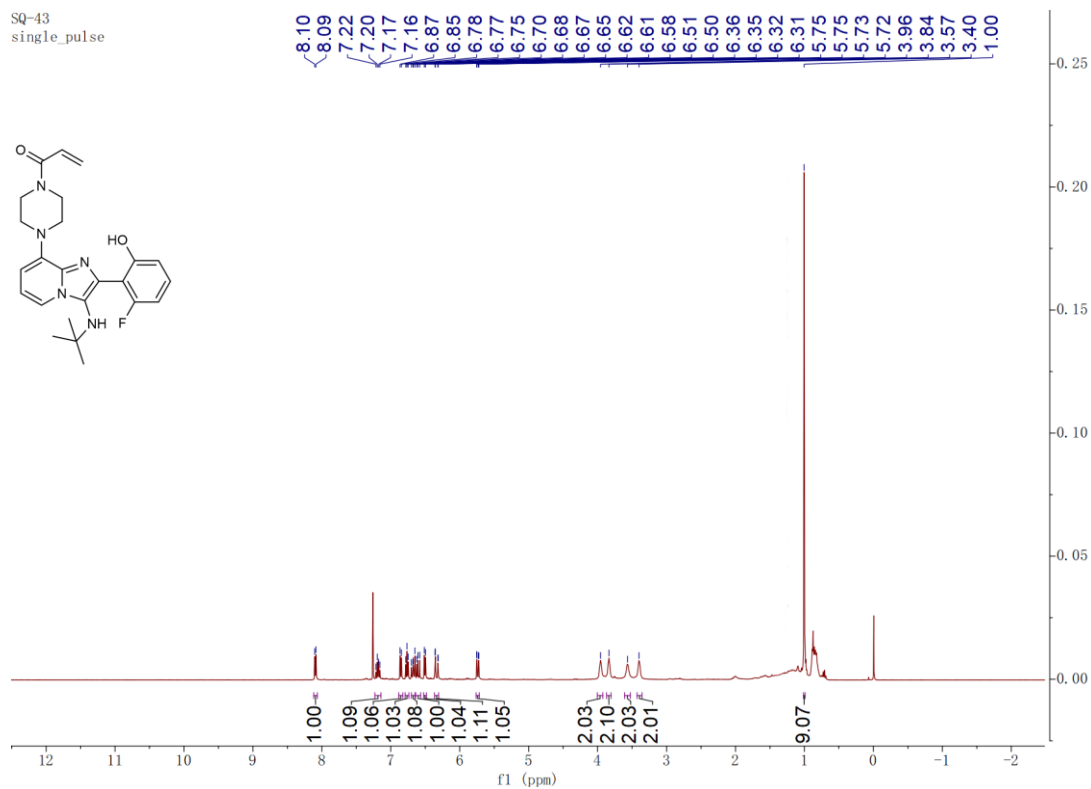

<sup>13</sup>C NMR spectrum of compound I-4 (100 MHz, Chloroform-*d*)

1. 1. 1r

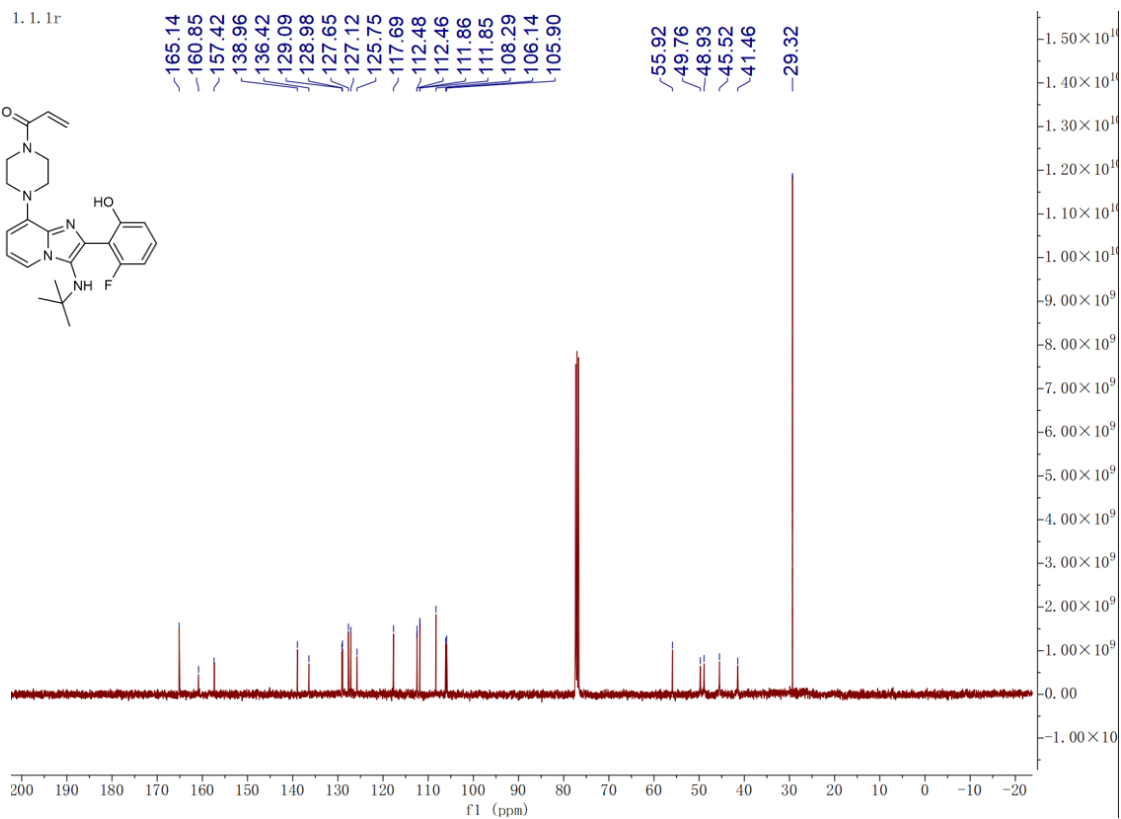

<sup>1</sup>H NMR spectrum of compound I-5 (400 MHz, Chloroform-*d*)

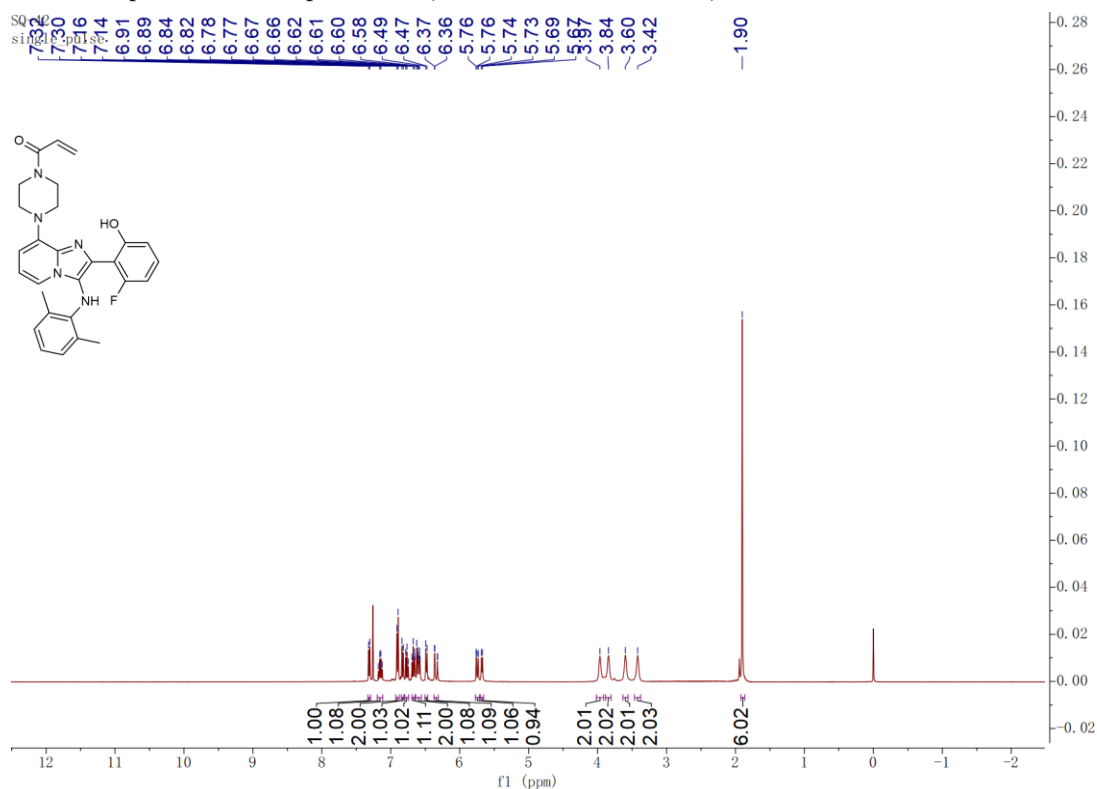

<sup>13</sup>C NMR spectrum of compound I-5 (100 MHz, Chloroform-*d*)

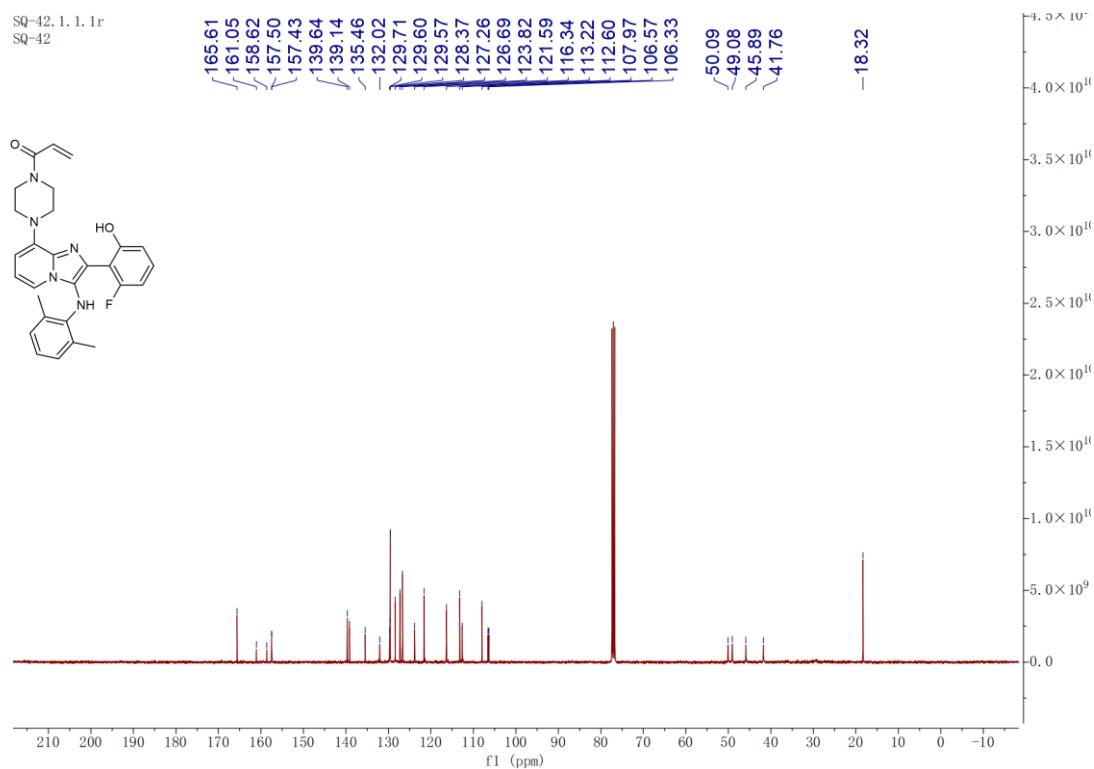

<sup>1</sup>H NMR spectrum of compound I-6 (400 MHz, Chloroform-*d*)

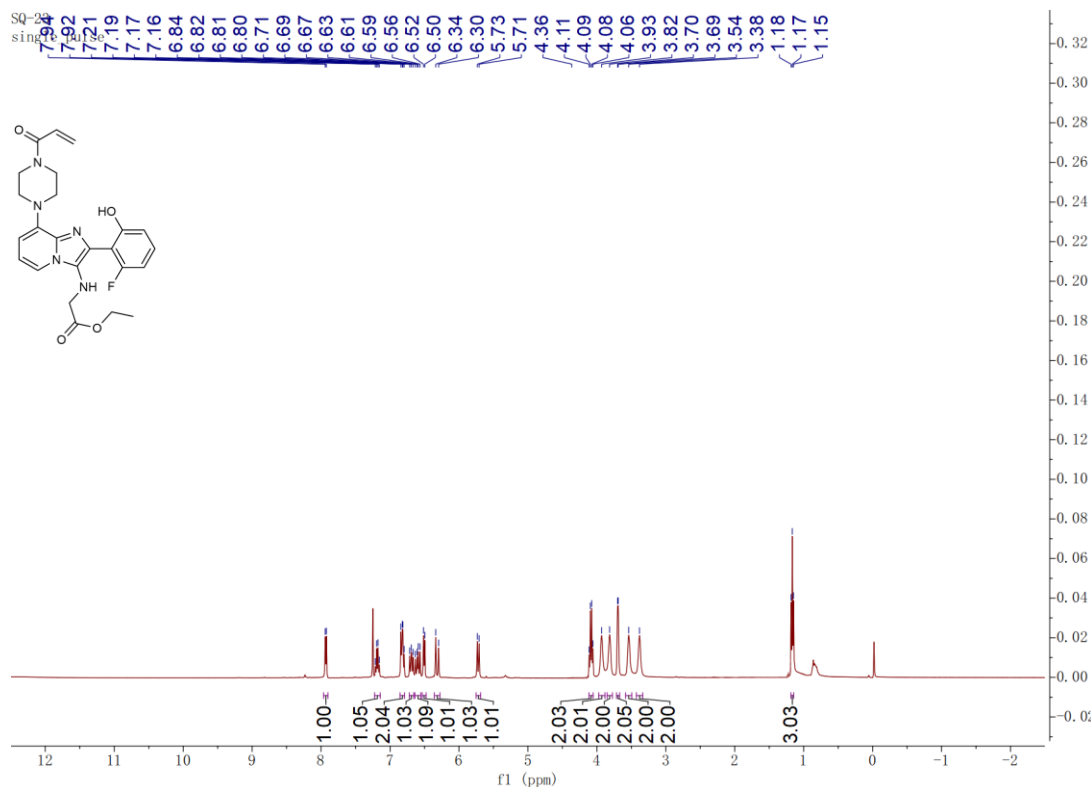

<sup>13</sup>C NMR spectrum of compound I-6 (100 MHz, Chloroform-*d*)

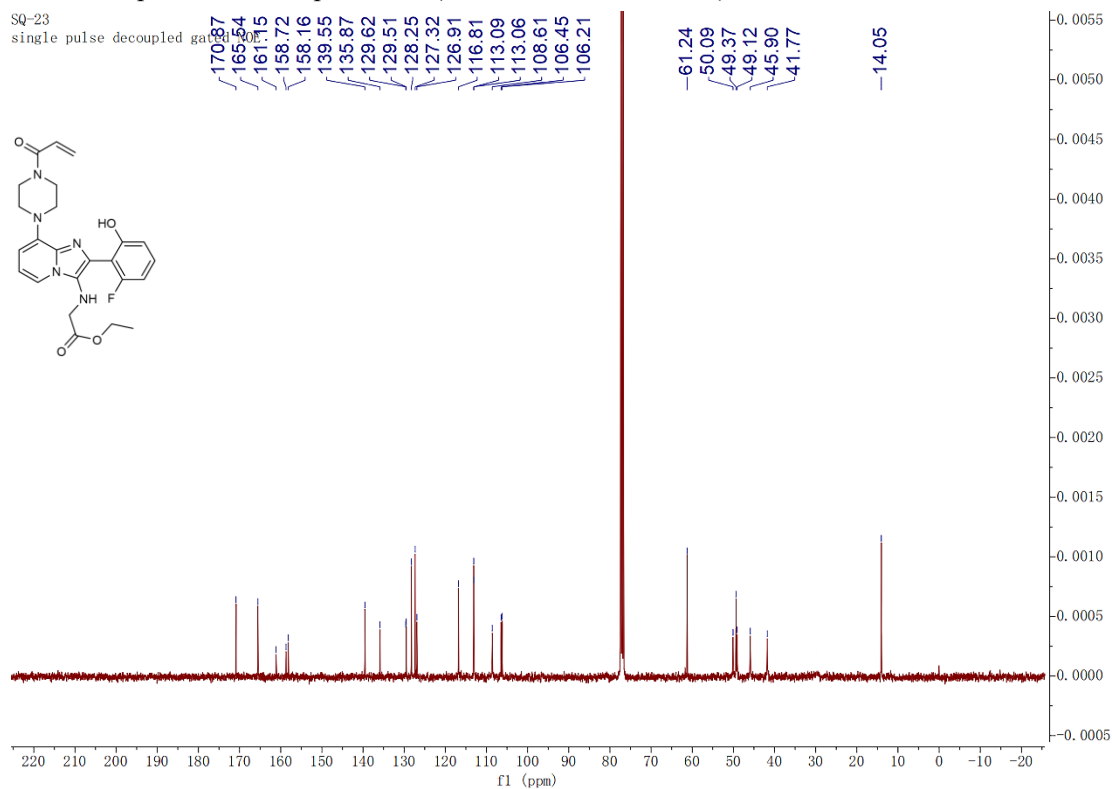

<sup>1</sup>H NMR spectrum of compound I-7 (400 MHz, Chloroform-*d*)

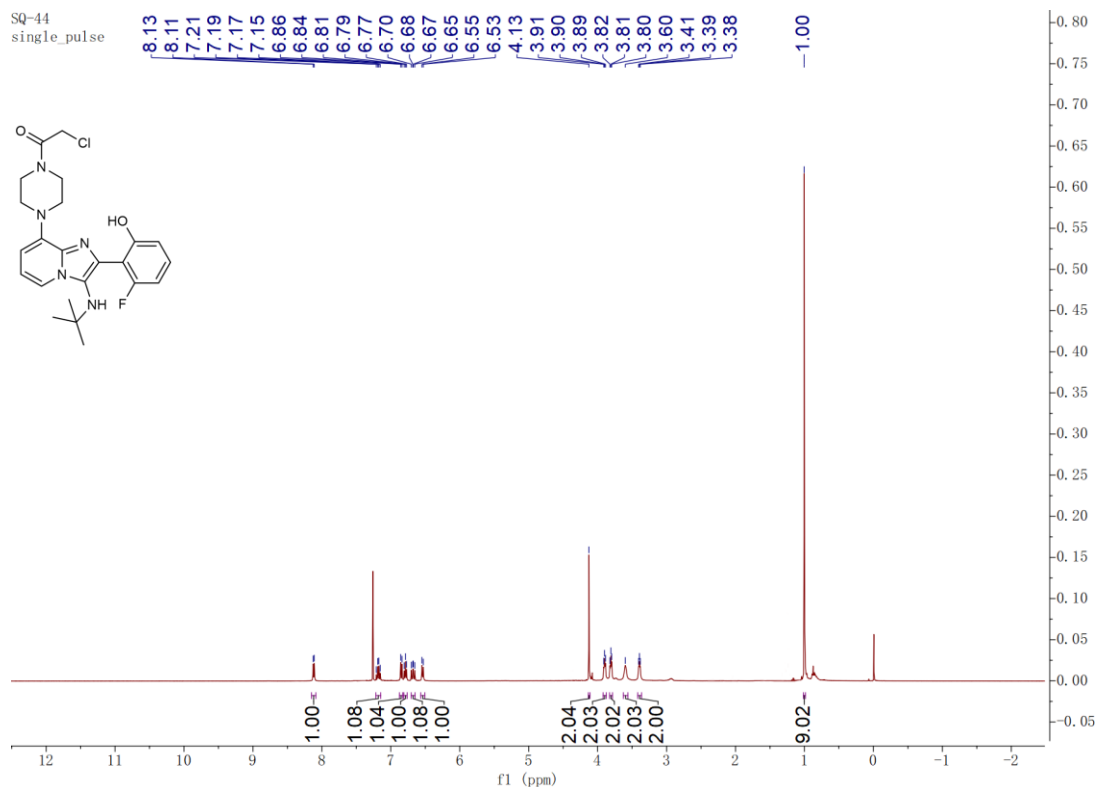

<sup>13</sup>C NMR spectrum of compound I-7 (100 MHz, Chloroform-*d*)

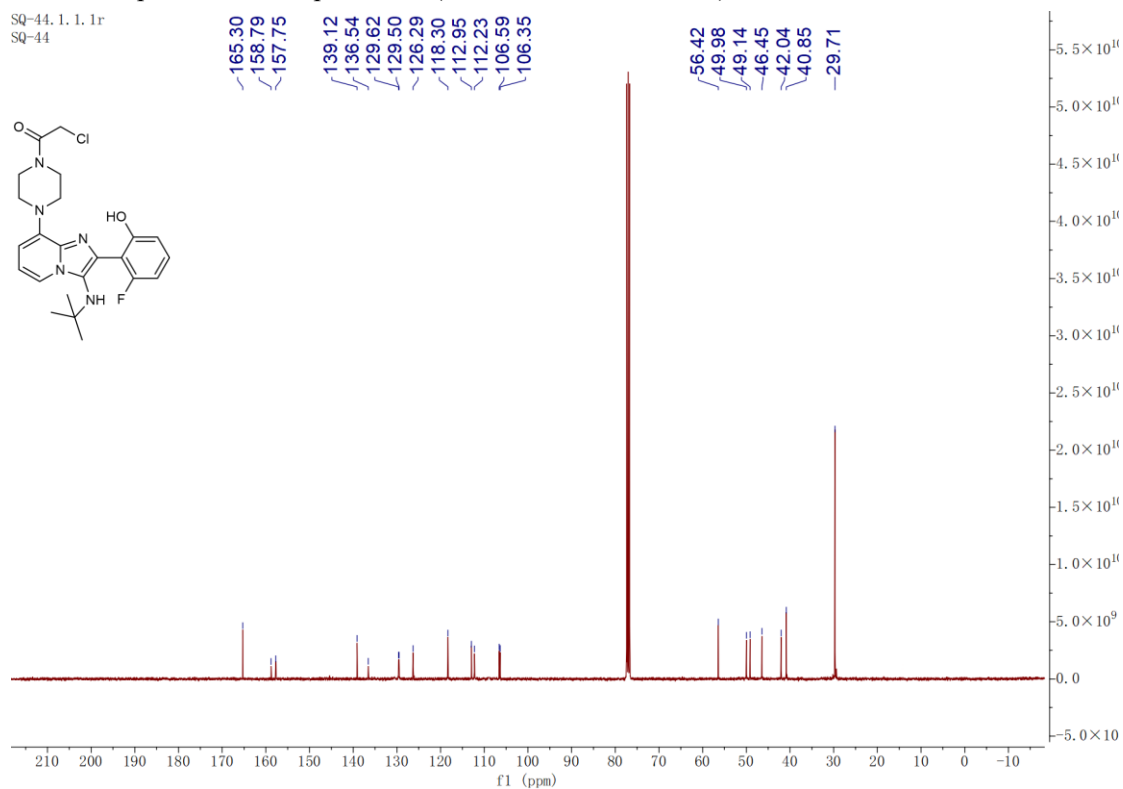

<sup>1</sup>H NMR spectrum of compound **I-8** (400 MHz, Chloroform-*d*)

SQ-40  
single\_pulse

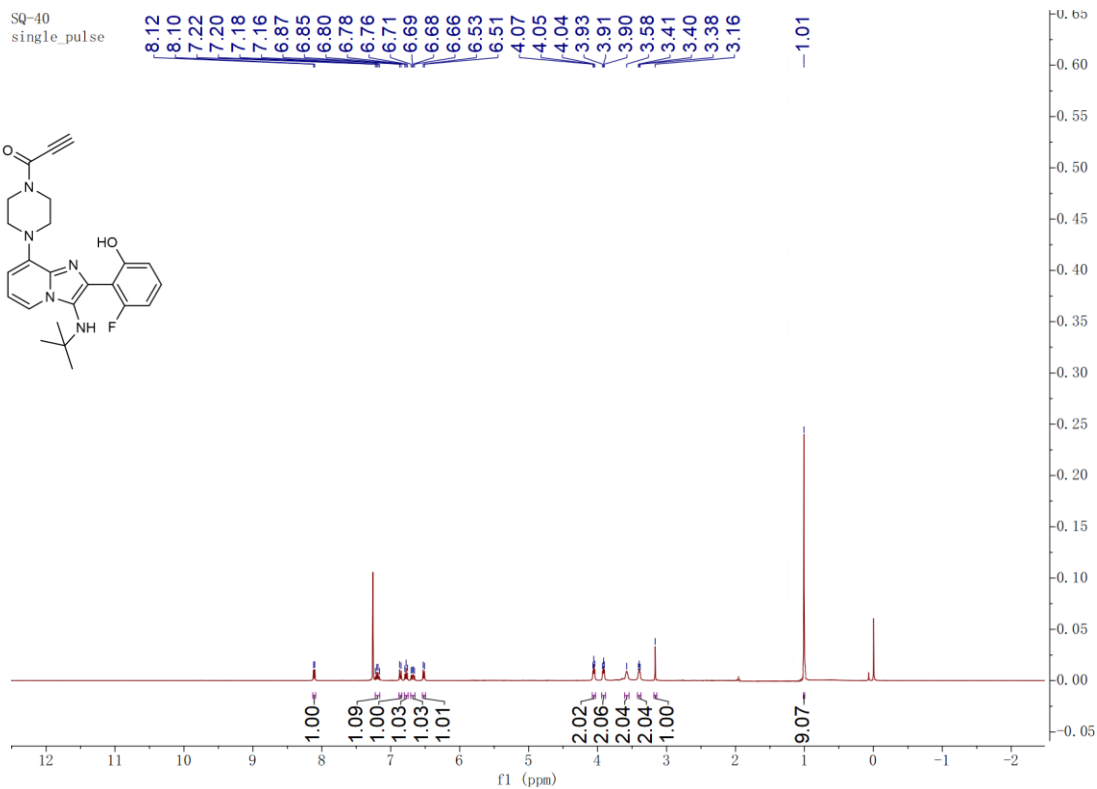

<sup>13</sup>C NMR spectrum of compound **I-8** (100 MHz, Chloroform-*d*)

1. 1. 1r

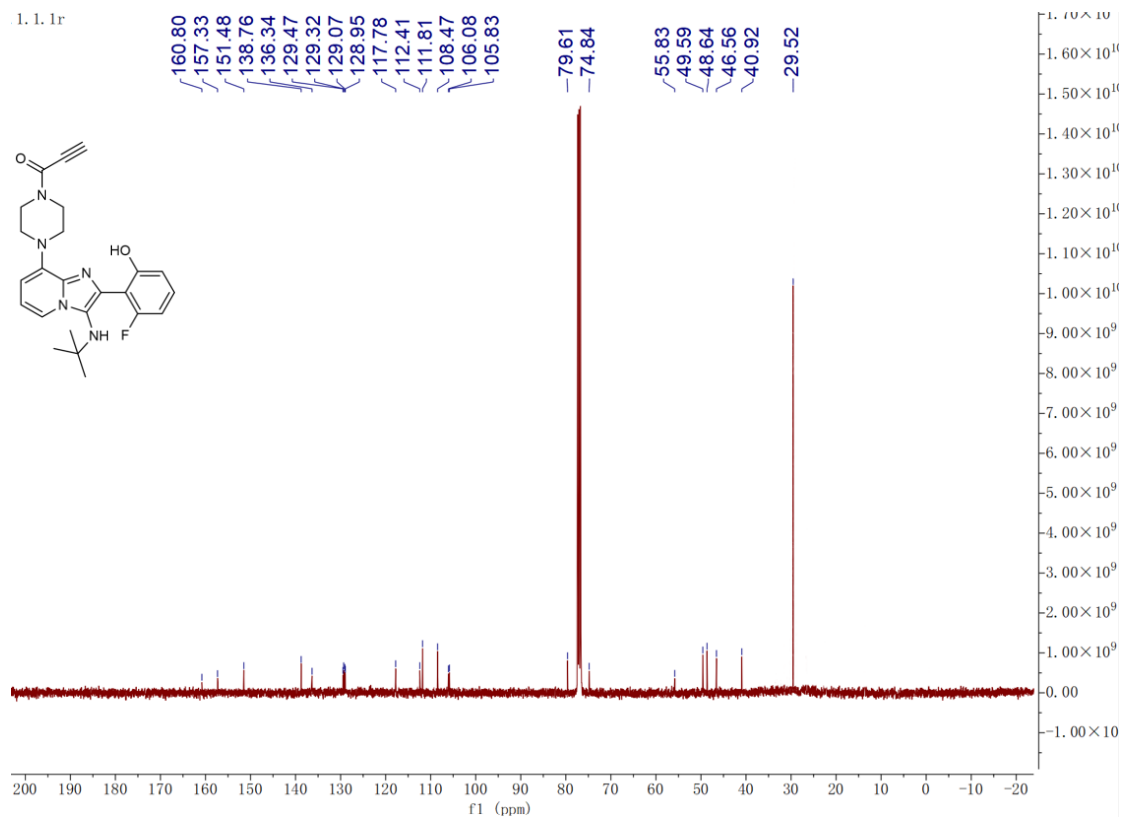



<sup>1</sup>H NMR spectrum of compound I-9 (400 MHz, Chloroform-*d*)

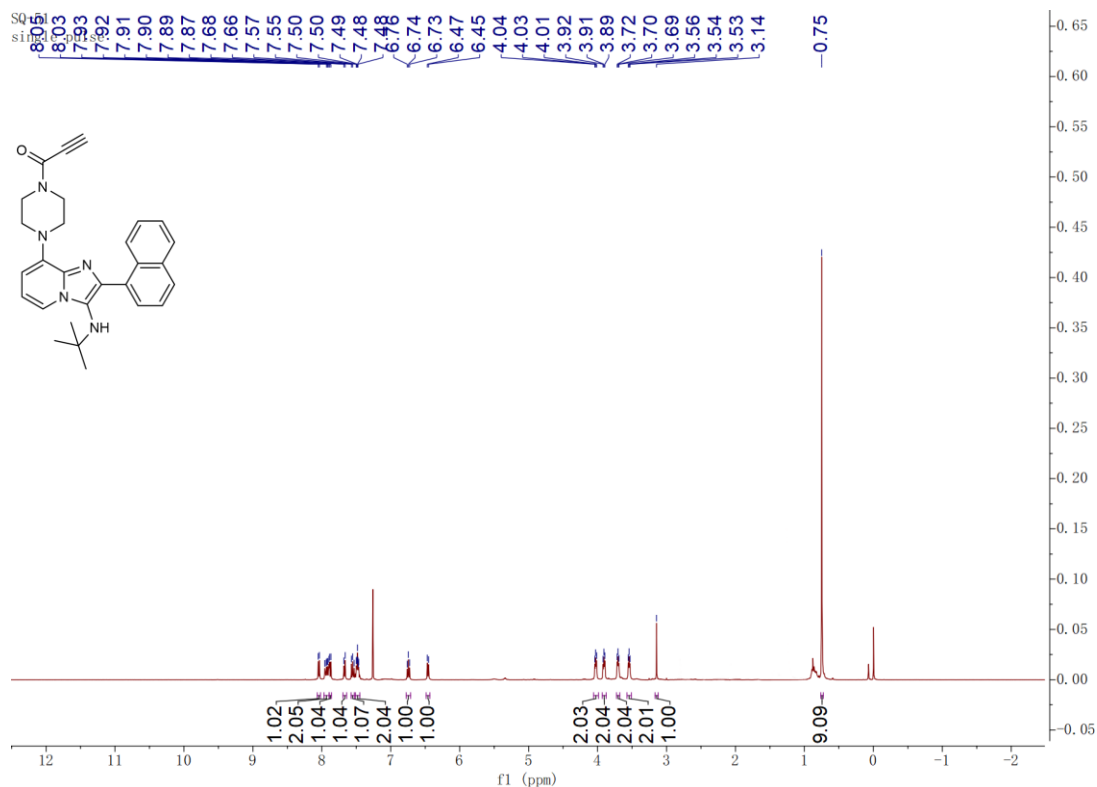

<sup>13</sup>C NMR spectrum of compound I-9 (100 MHz, Chloroform-*d*)

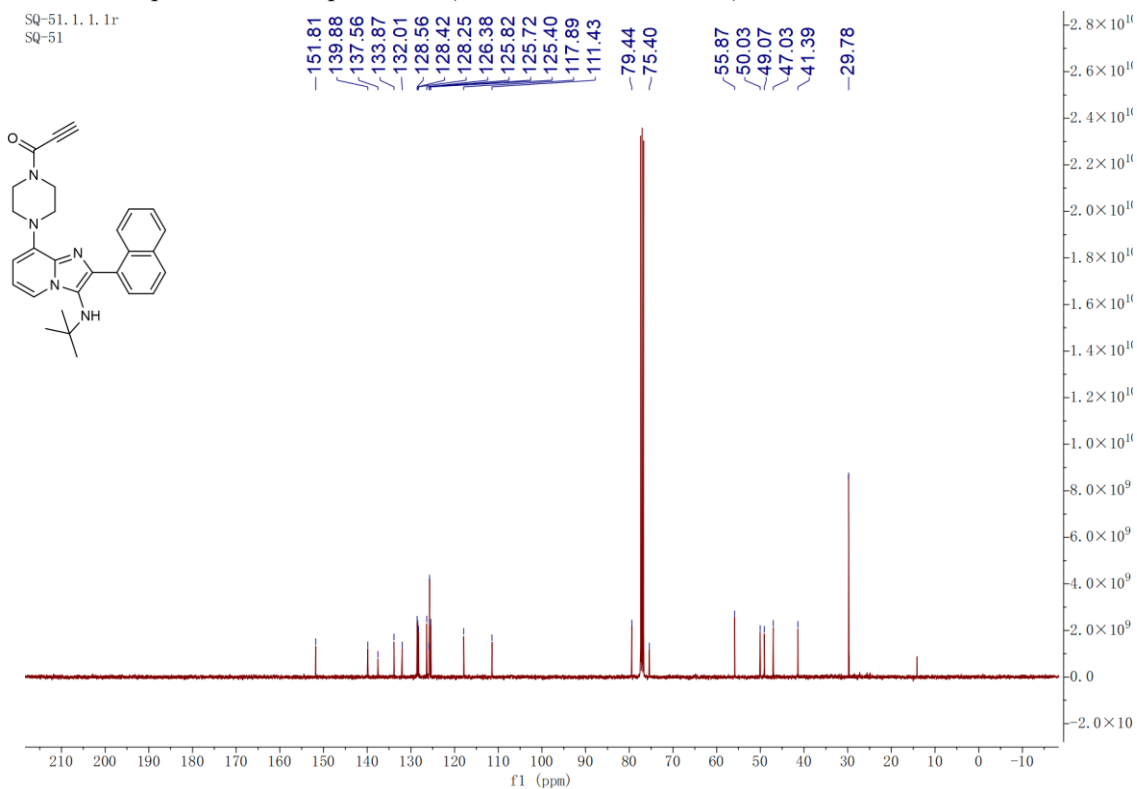

<sup>1</sup>H NMR spectrum of compound **I-10** (400 MHz, Chloroform-*d*)

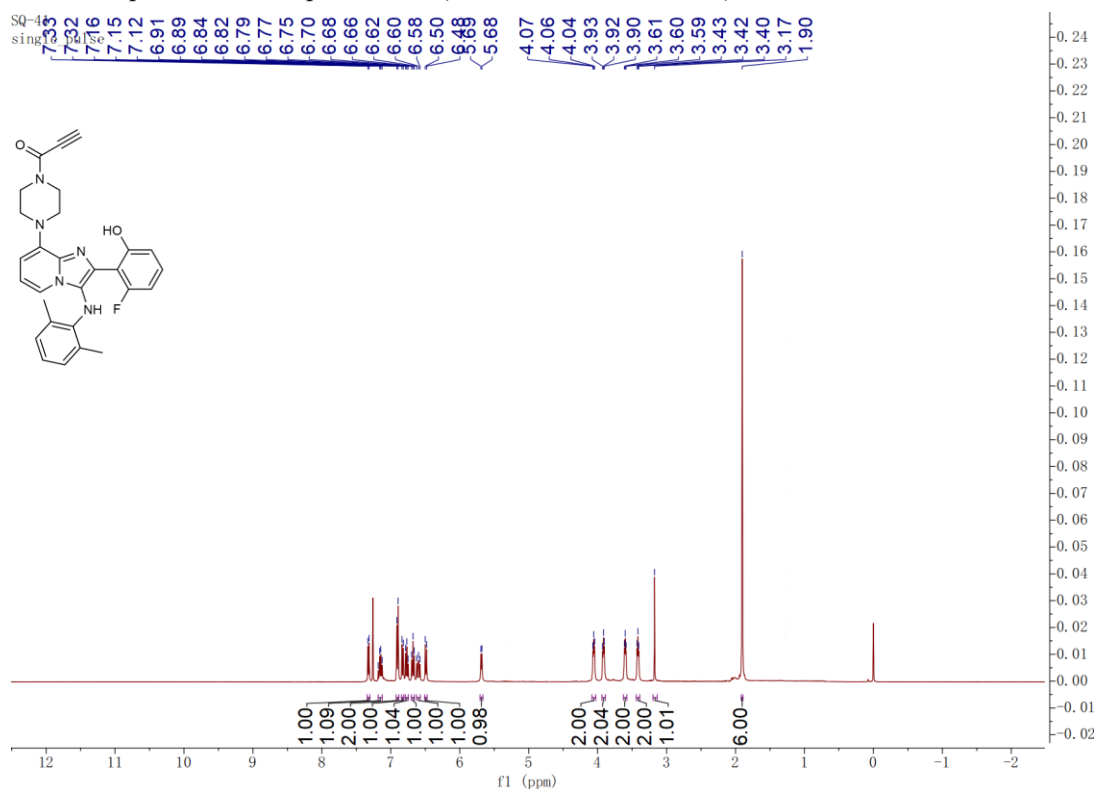

<sup>13</sup>C NMR spectrum of compound **I-10** (100 MHz, Chloroform-*d*)

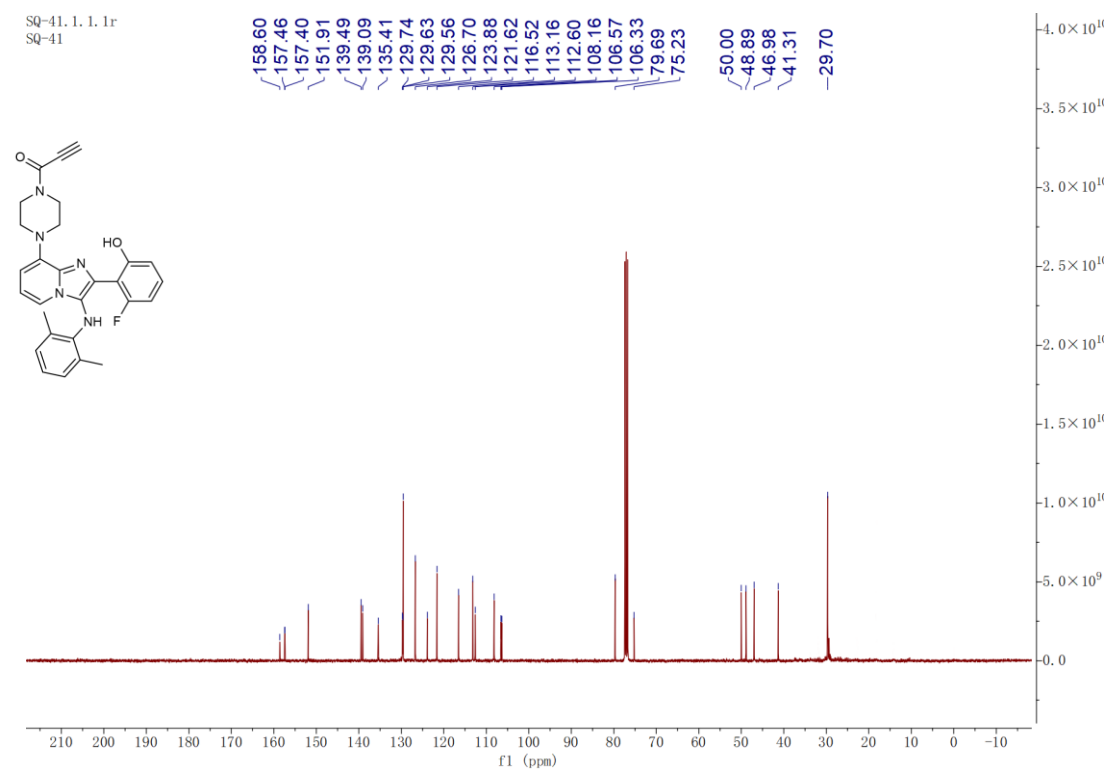

<sup>1</sup>H NMR spectrum of compound **I-11** (400 MHz, Chloroform-*d*)

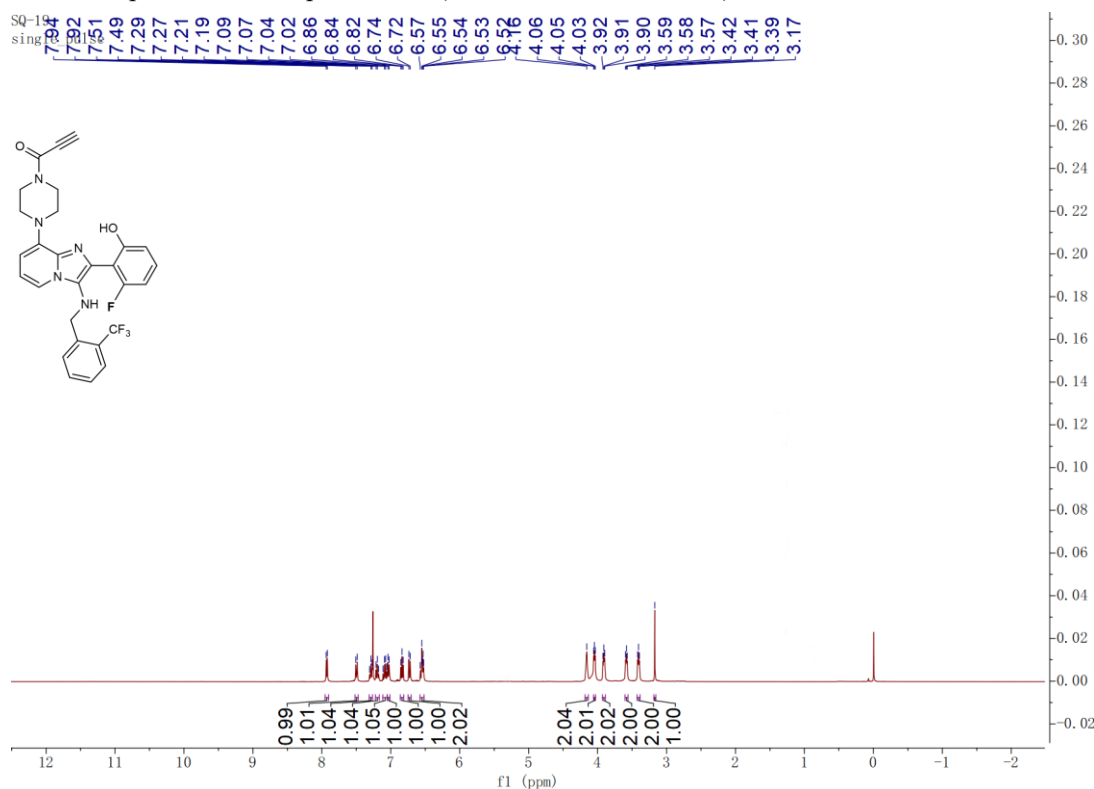

<sup>13</sup>C NMR spectrum of compound **I-11** (100 MHz, Chloroform-*d*)

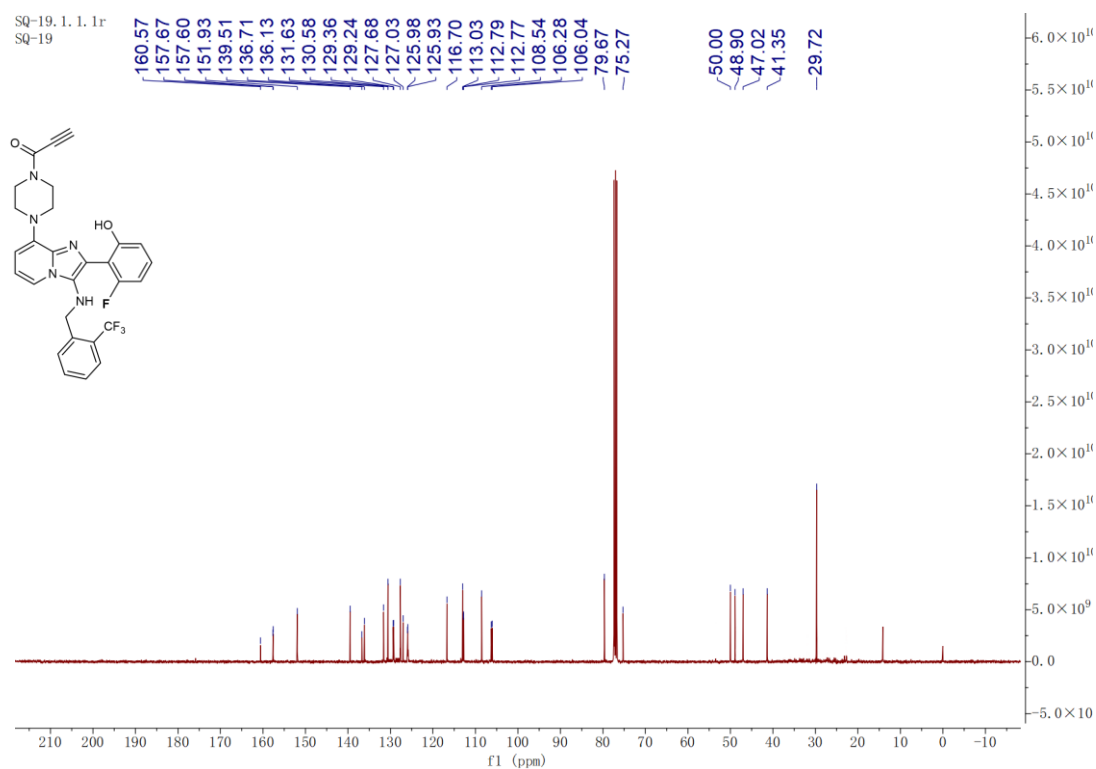

<sup>1</sup>H NMR spectrum of compound **I-12** (400 MHz, Chloroform-*d*)

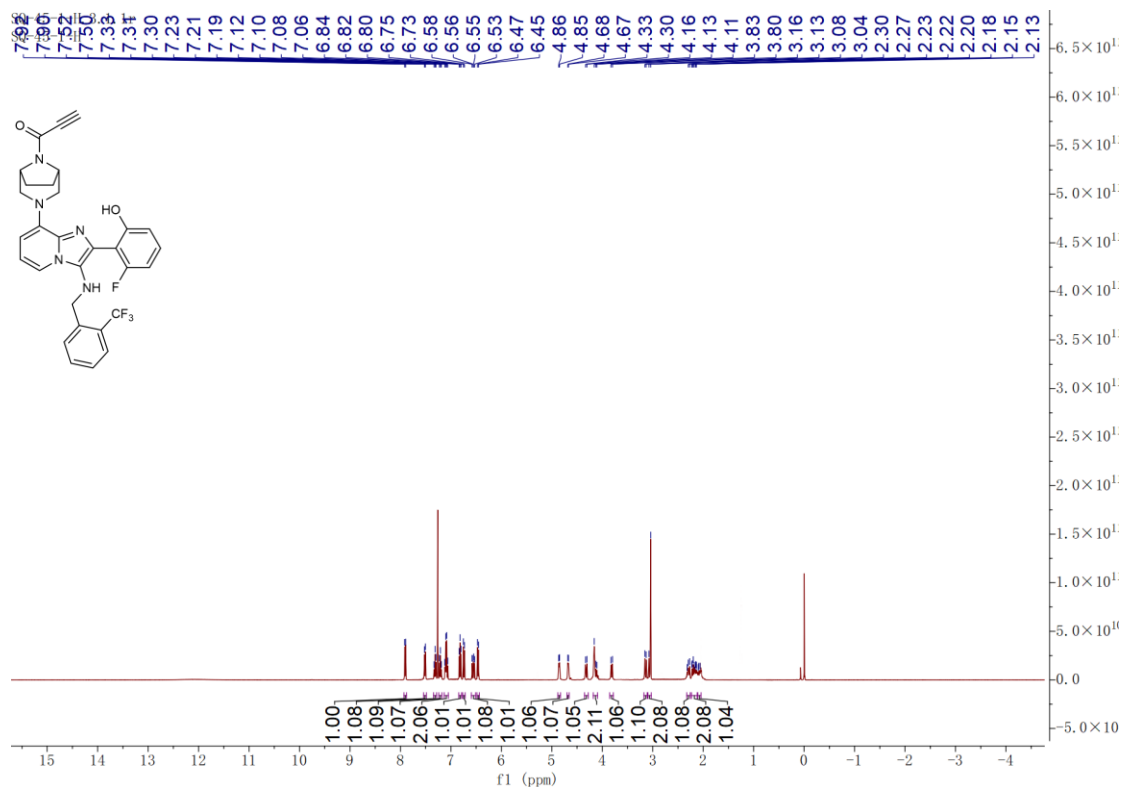

<sup>13</sup>C NMR spectrum of compound **I-12** (100 MHz, Chloroform-*d*)

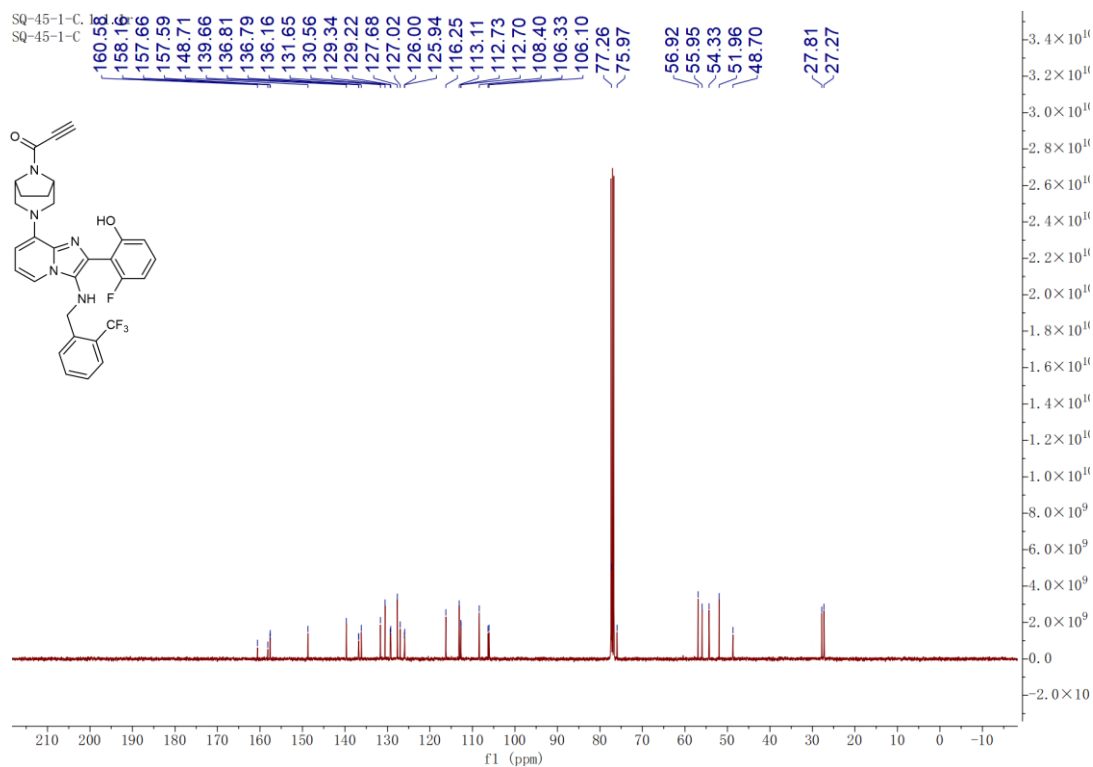

<sup>1</sup>H NMR spectrum of compound **I-13** (400 MHz, Chloroform-*d*)

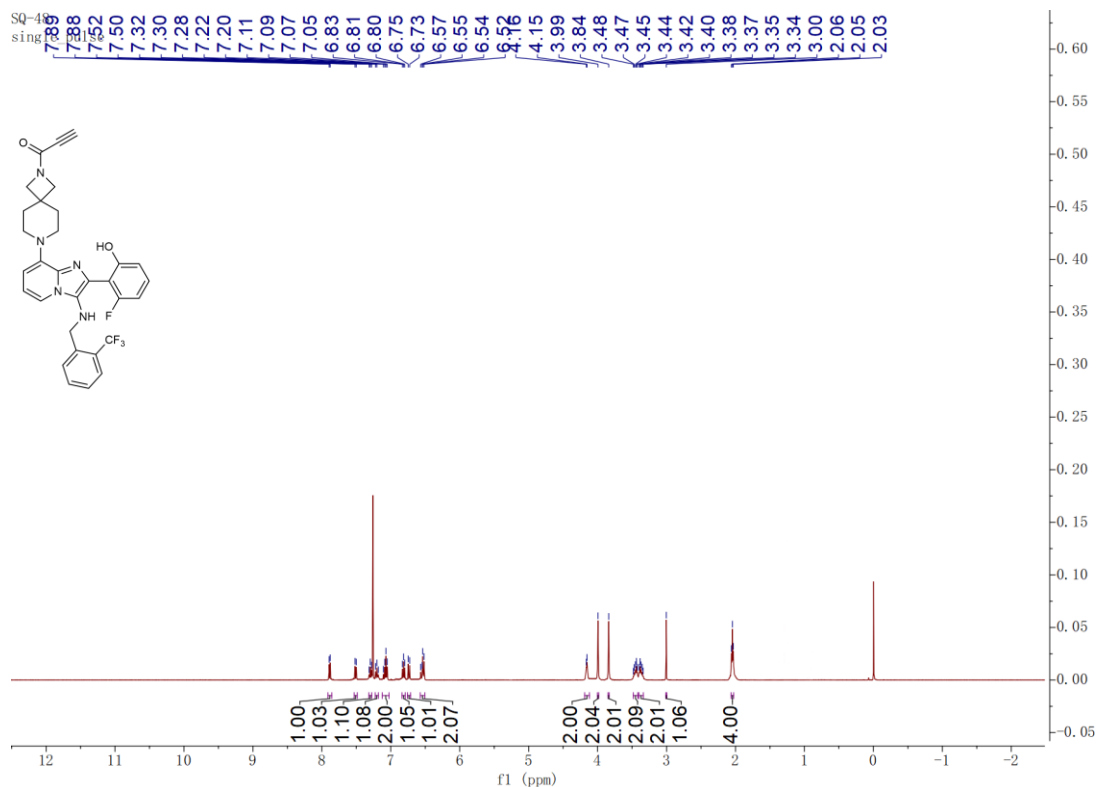

<sup>13</sup>C NMR spectrum of compound **I-13** (100 MHz, Chloroform-*d*)

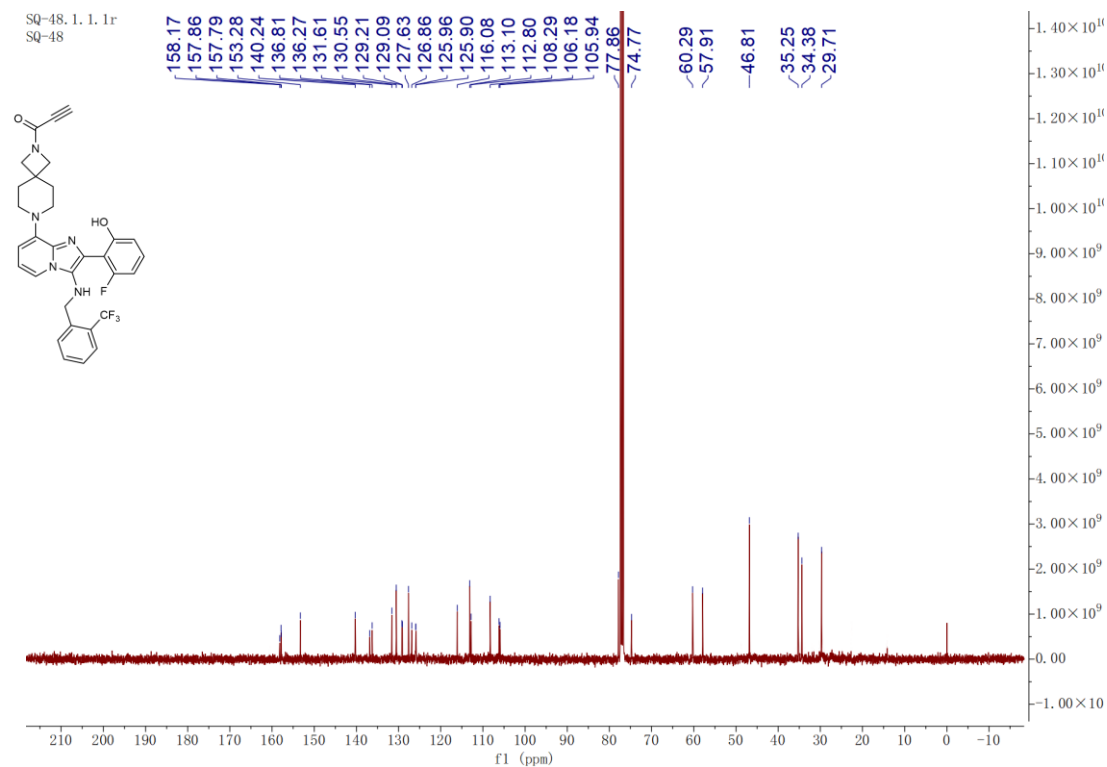

<sup>1</sup>H NMR spectrum of compound **I-14** (400 MHz, Chloroform-*d*)

SQ-35  
single\_pulse

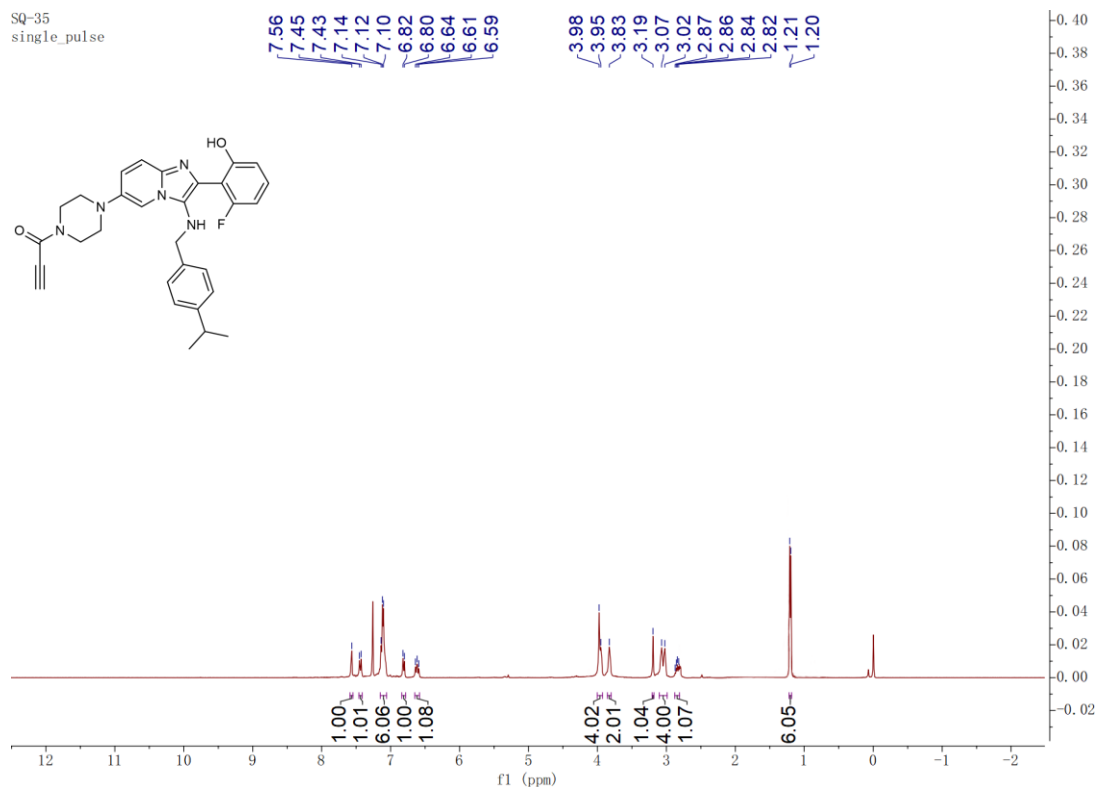

<sup>13</sup>C NMR spectrum of compound **I-14** (100 MHz, Chloroform-*d*)

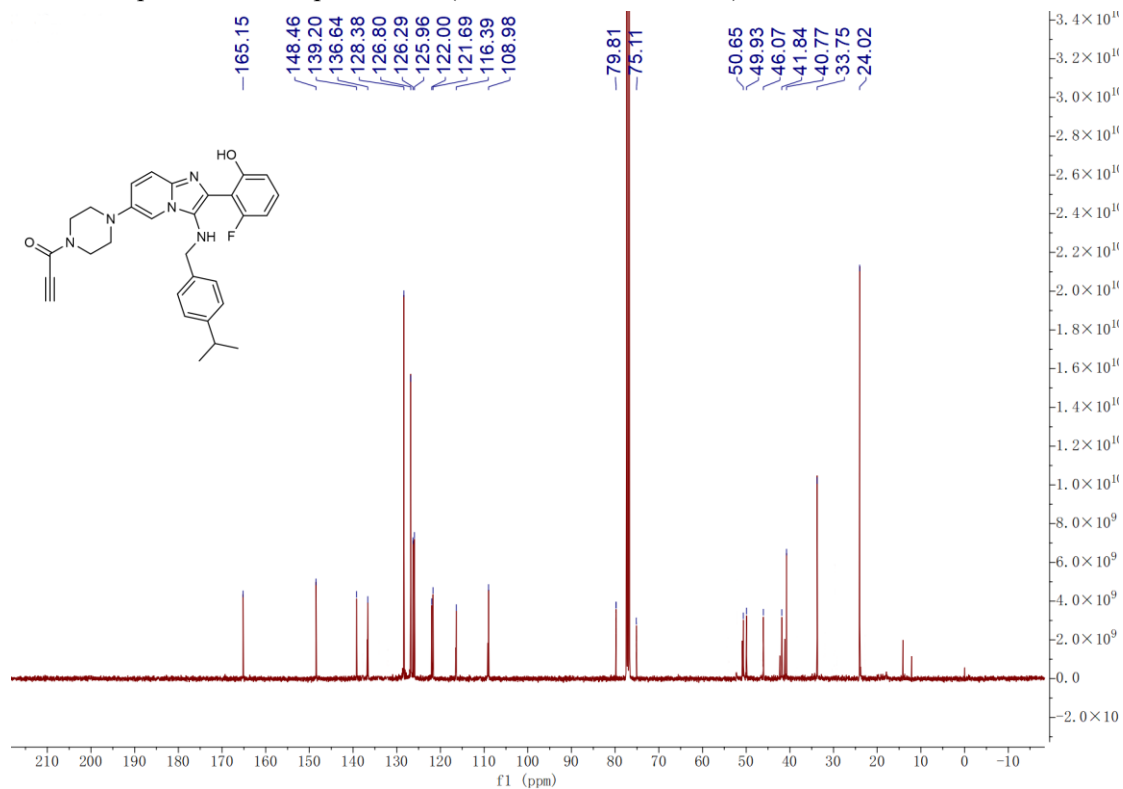

<sup>1</sup>H NMR spectrum of compound I-15 (400 MHz, Chloroform-*d*)

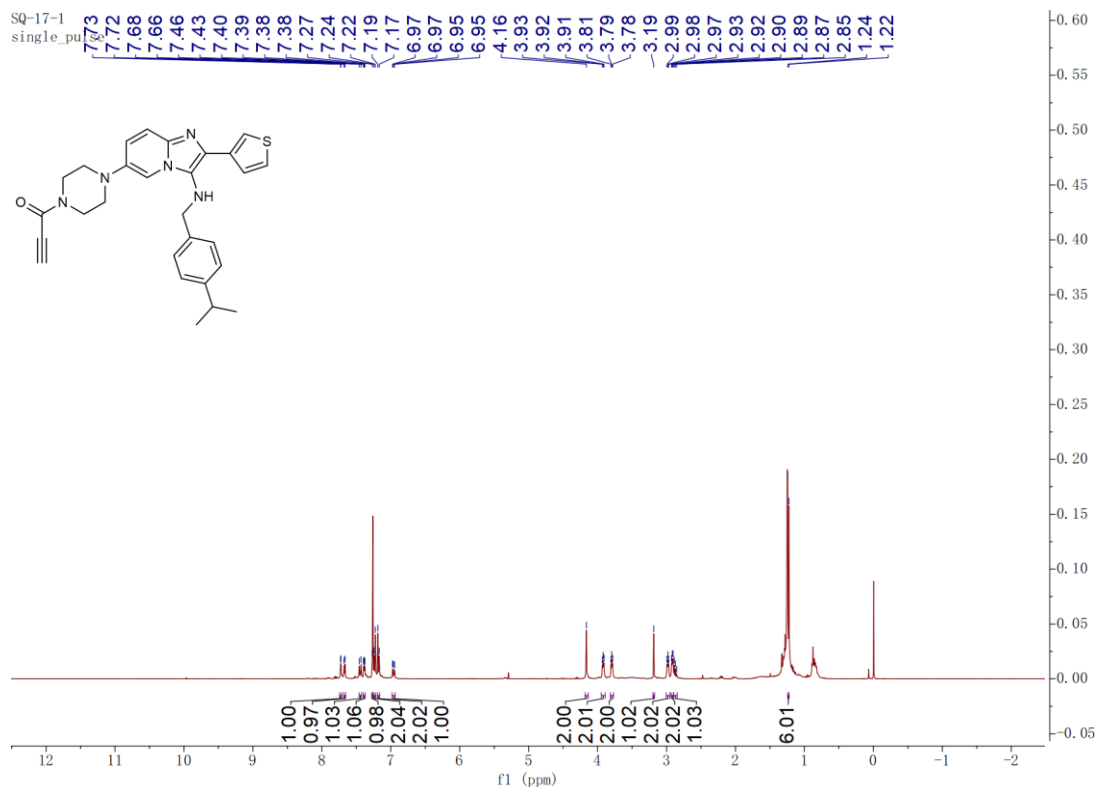

<sup>13</sup>C NMR spectrum of compound I-15 (100 MHz, Chloroform-*d*)

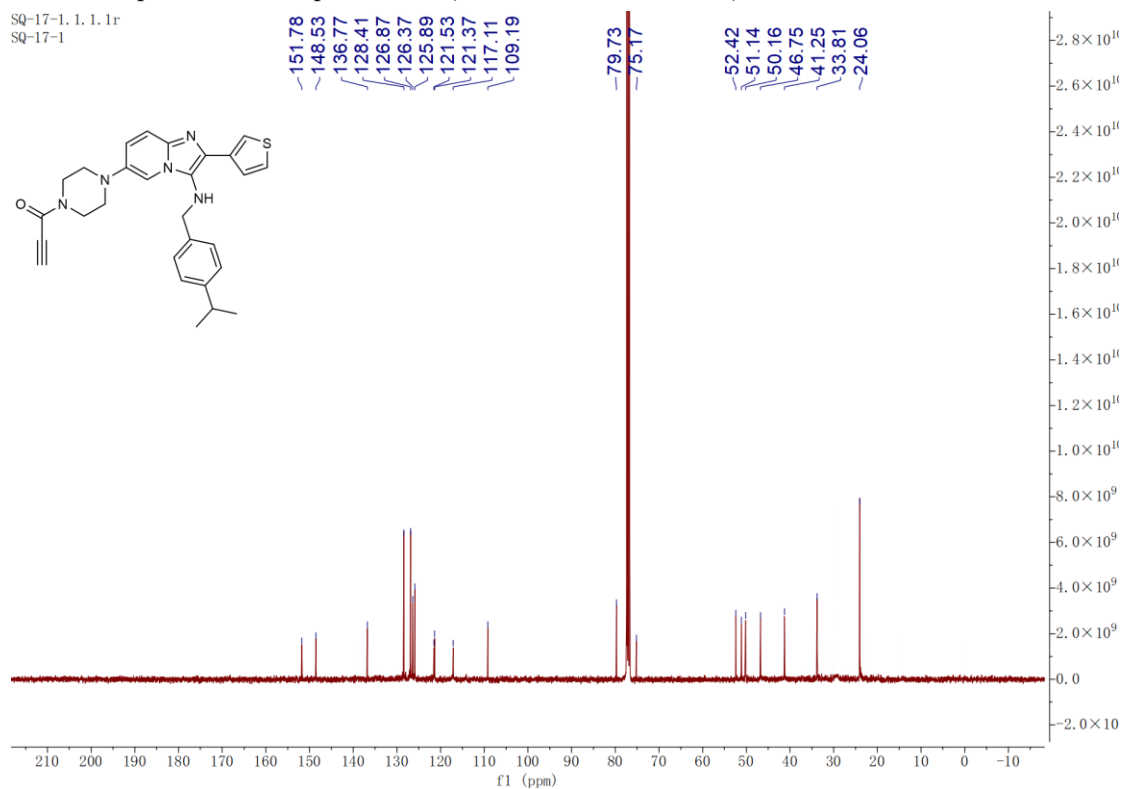

<sup>1</sup>H NMR spectrum of compound **I-16** (400 MHz, Chloroform-*d*)

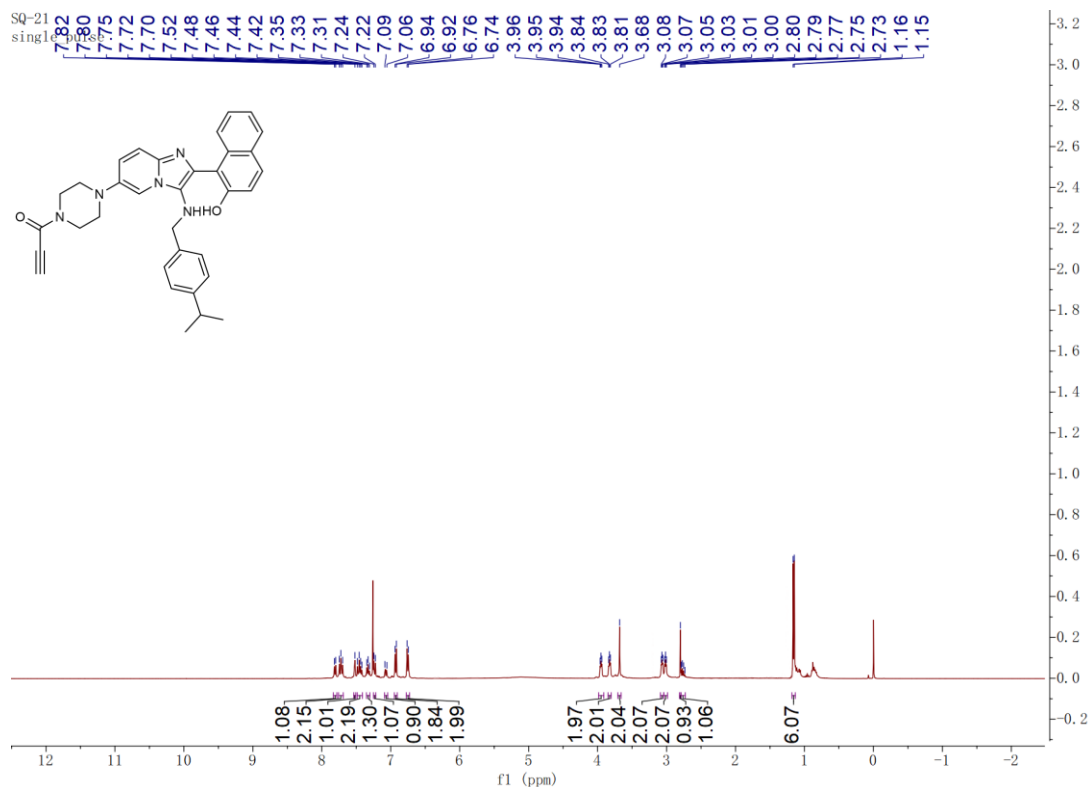

<sup>13</sup>C NMR spectrum of compound **I-16** (100 MHz, Chloroform-*d*)

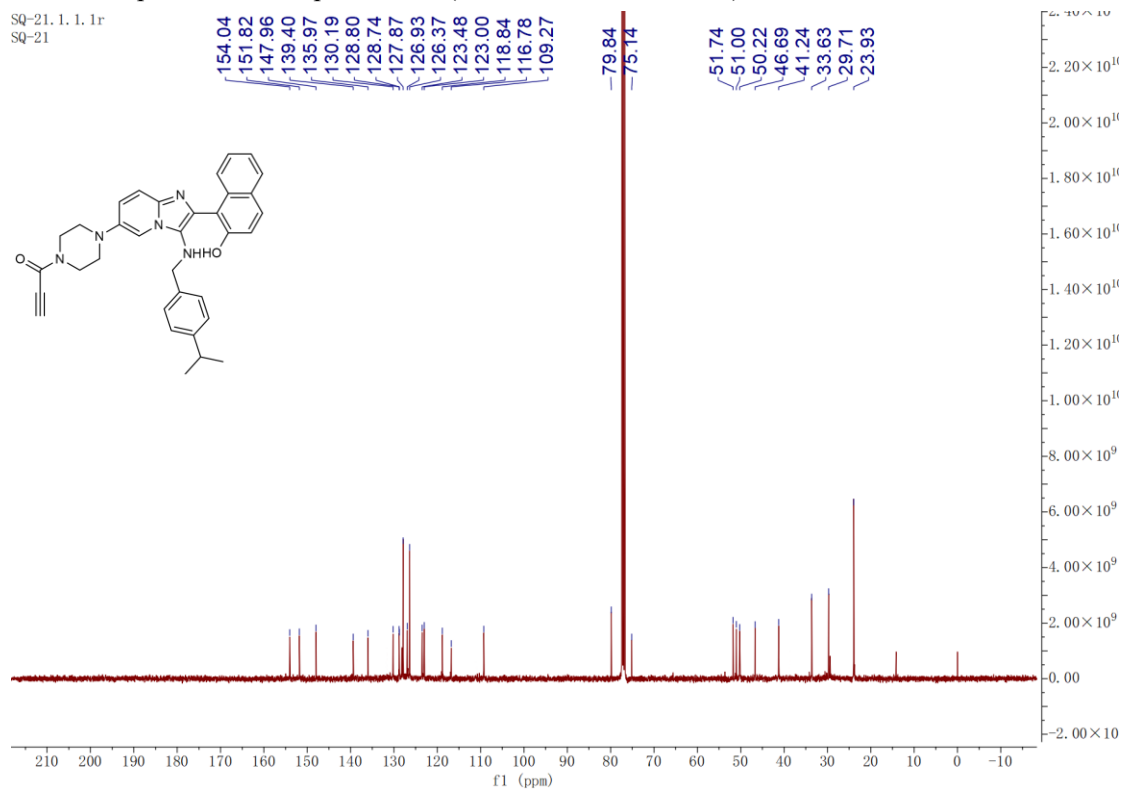



<sup>1</sup>H NMR spectrum of compound I-17 (400 MHz, Chloroform-*d*)

SQ-28  
single\_pulse

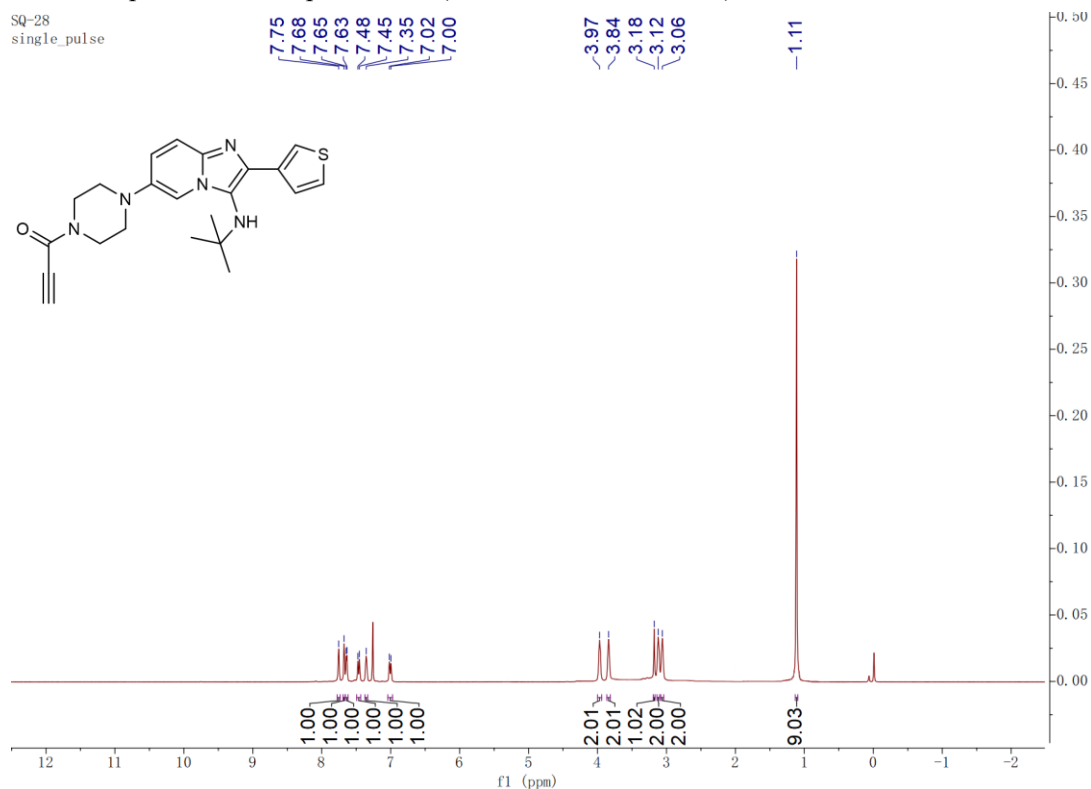

<sup>13</sup>C NMR spectrum of compound I-17 (100 MHz, Chloroform-*d*)

SQ-28.1.1.1r  
SQ-28

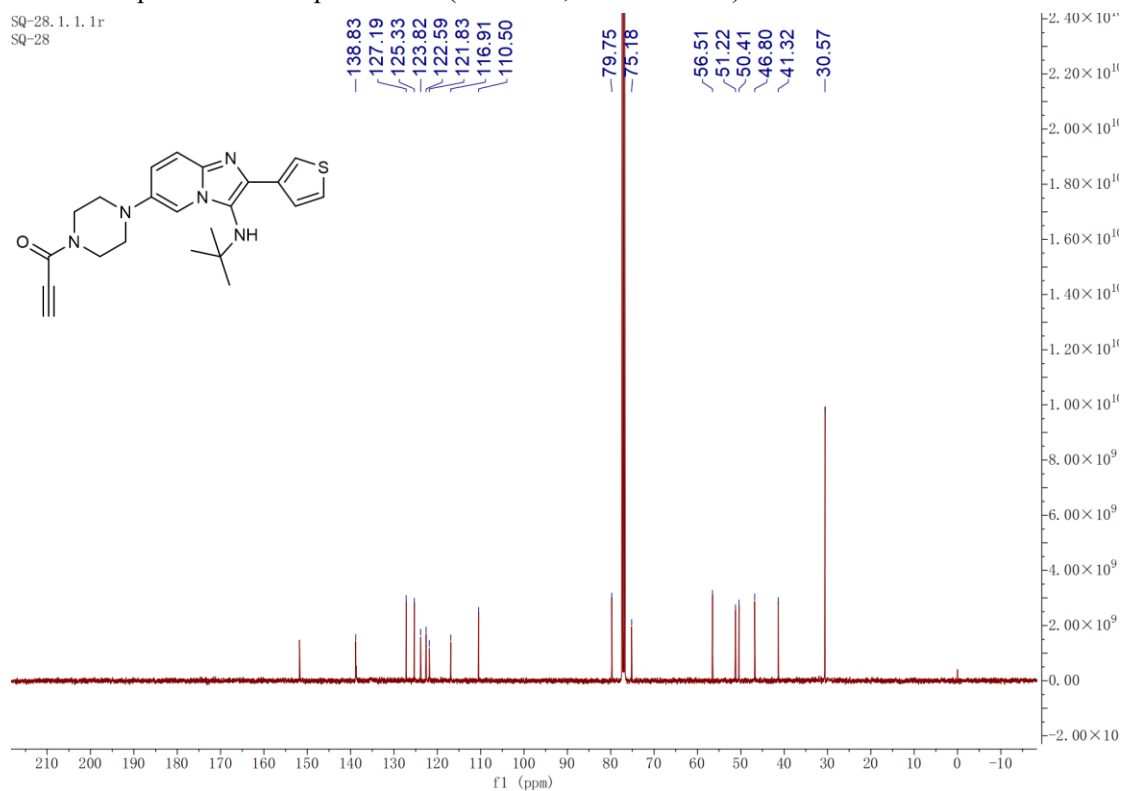

### 3. MS and HRMS spectra of compounds synthesized

#### I-1 MS

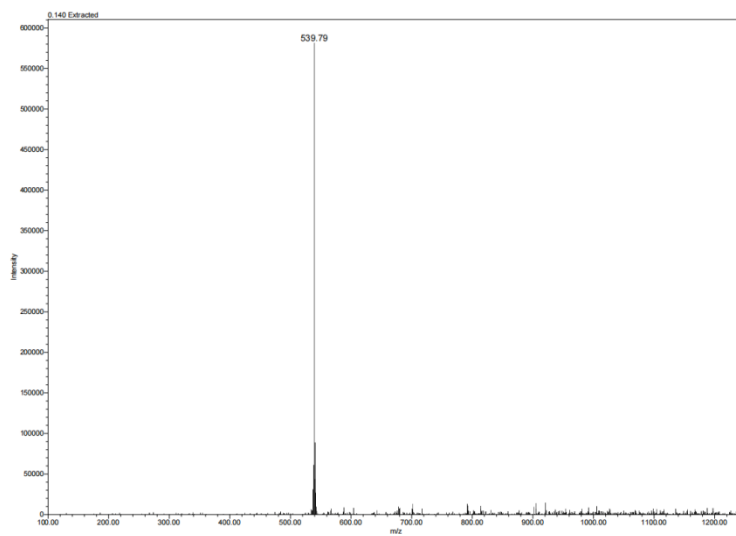

#### I-2 MS

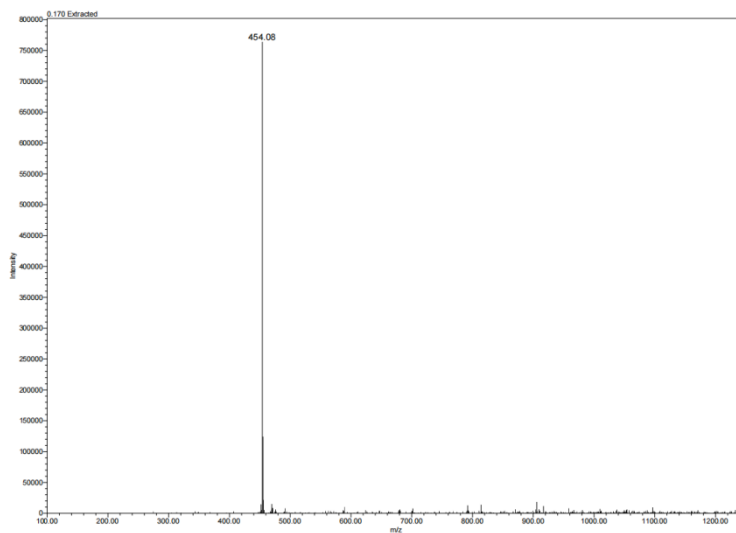

#### I-3 MS

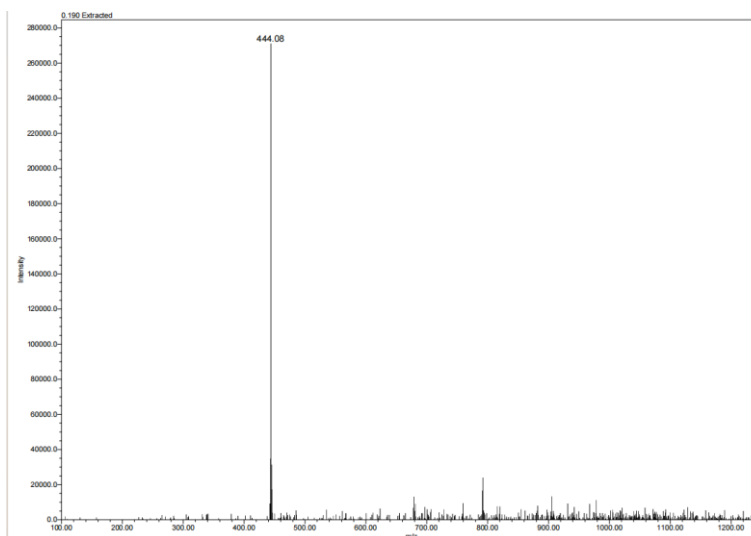

### I-4 MS

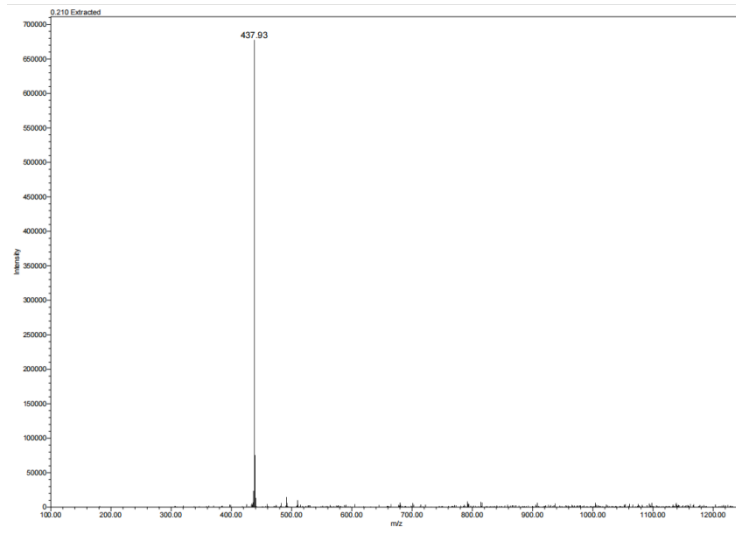

### I-5 MS

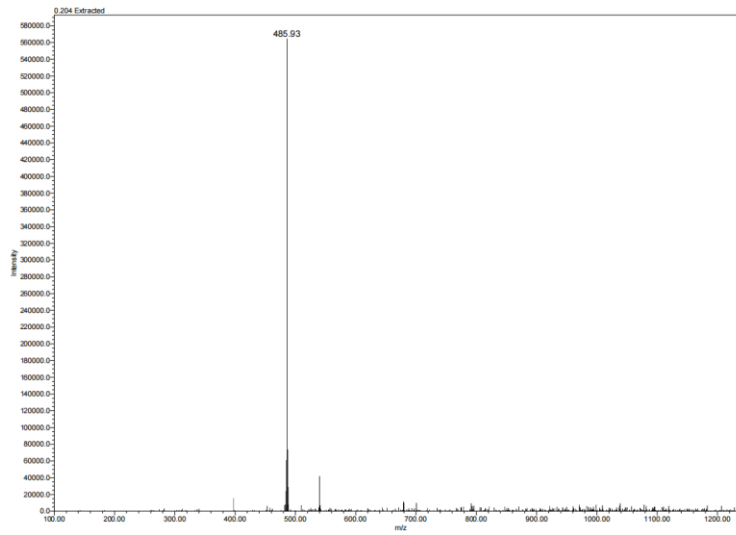

### I-6 MS

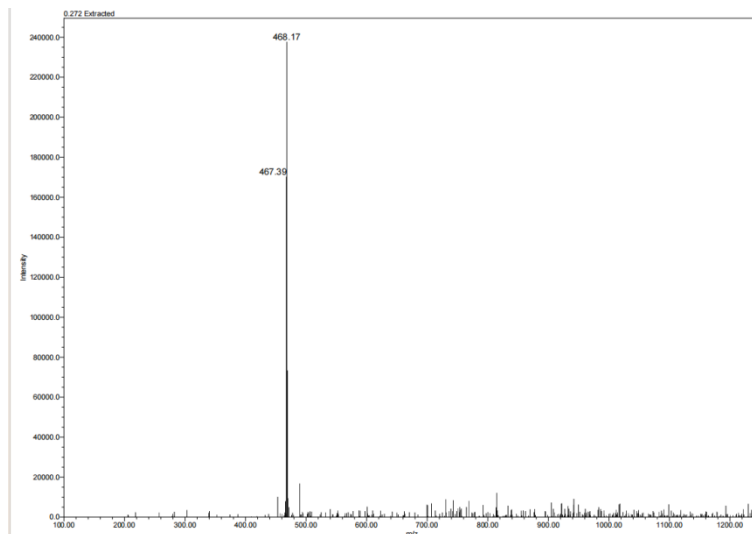

I-7 MS

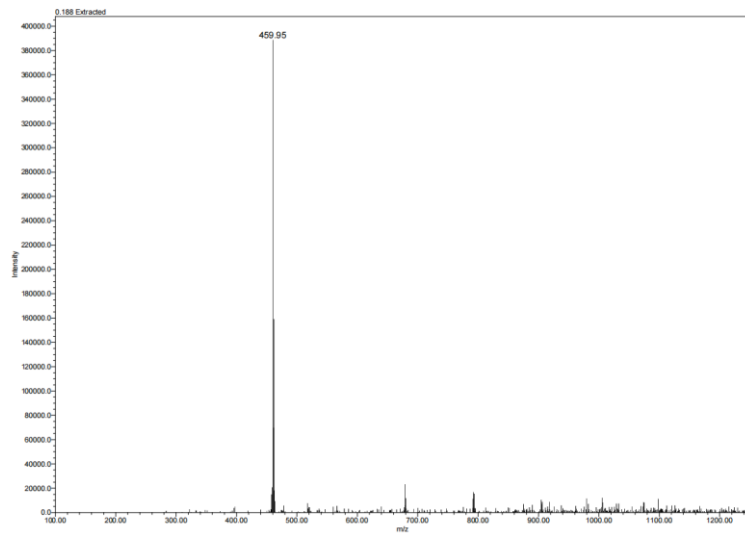

I-8 MS

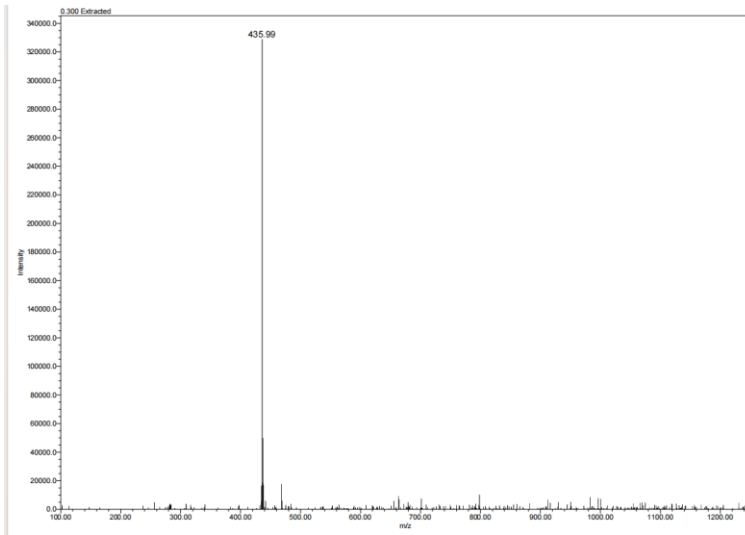

I-9 MS

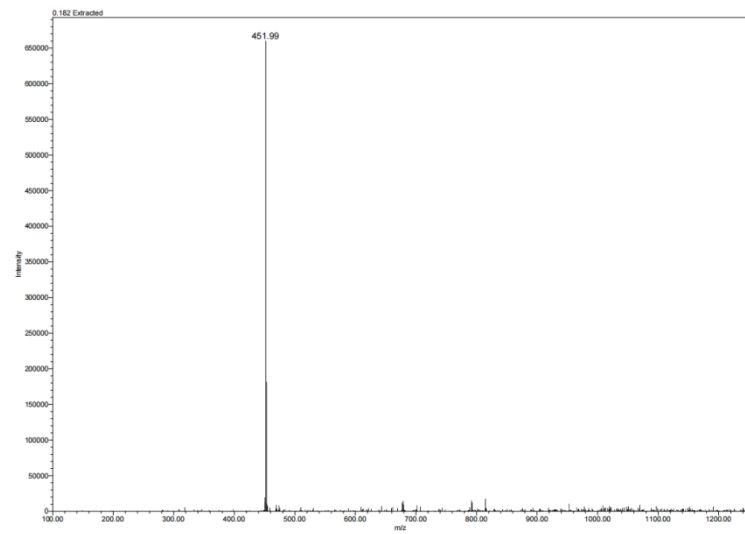

### I-10 MS

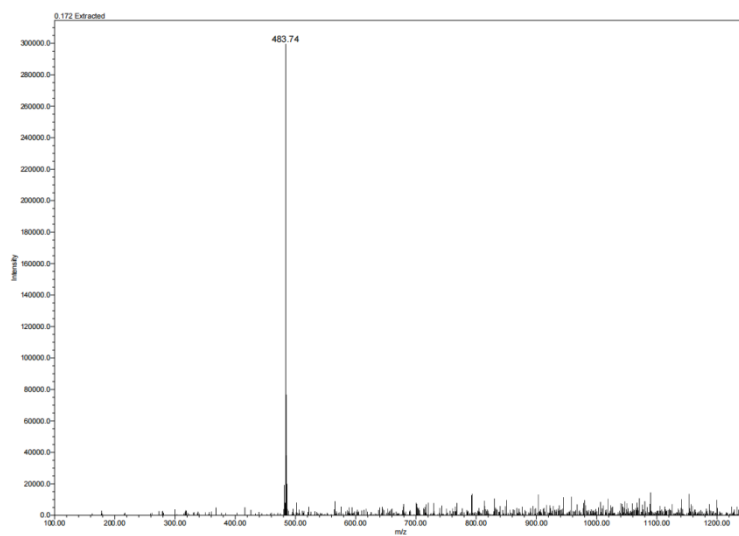

### I-11 HRMS

20231010-SQ-19\_231010083137 #25 RT: 0.20 AV: 1 NL: 2.05E8  
T: FTMS + p ESIFul ms [150.00-1000.00]

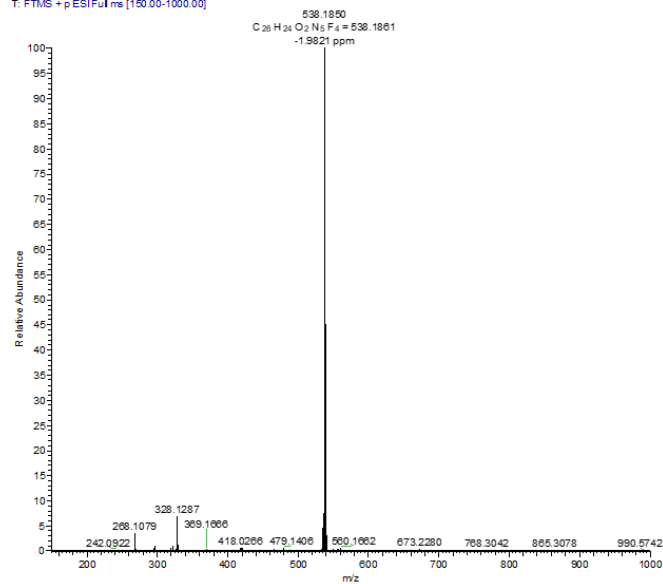

### I-12 MS

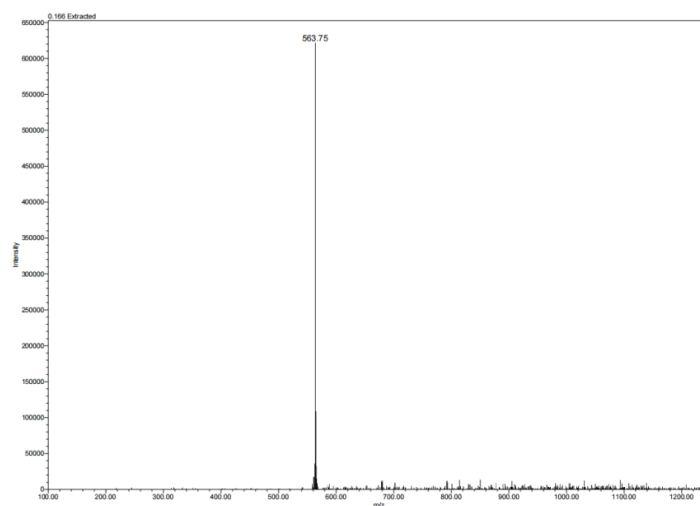

I-13 MS

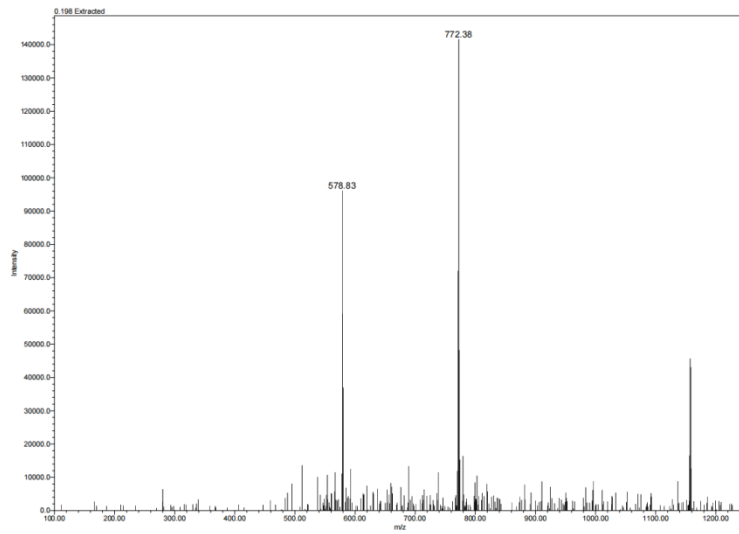

I-14 MS

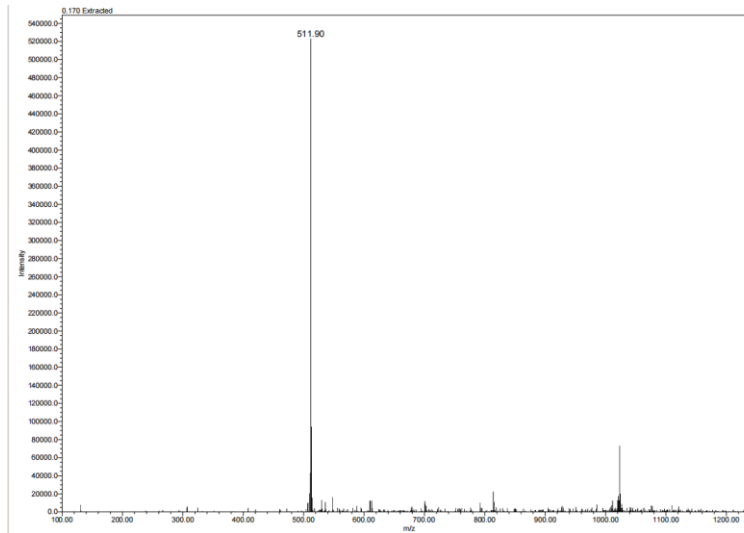

I-15 MS

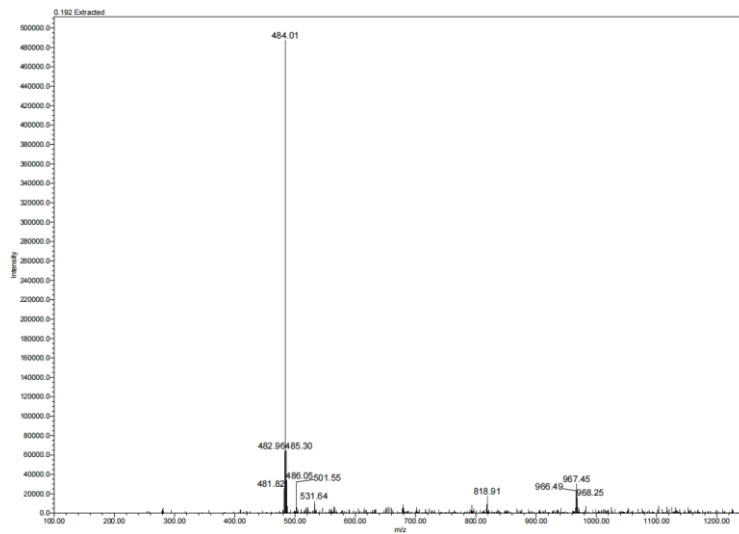

I-16 MS

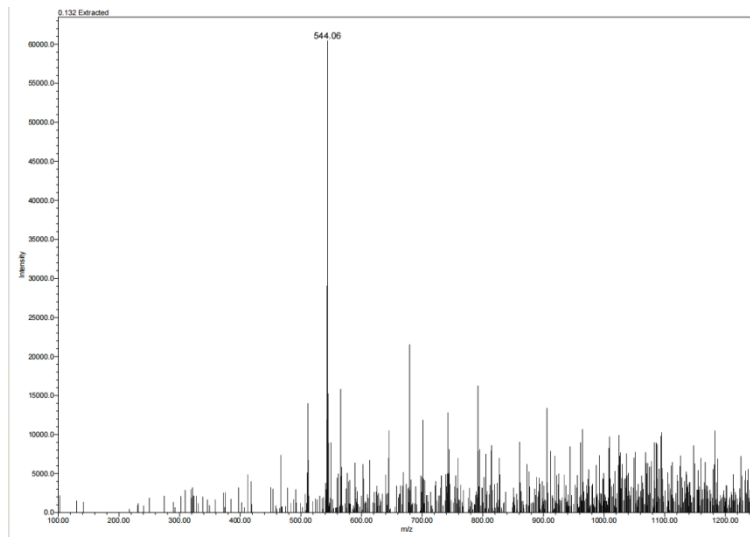

I-17 MS

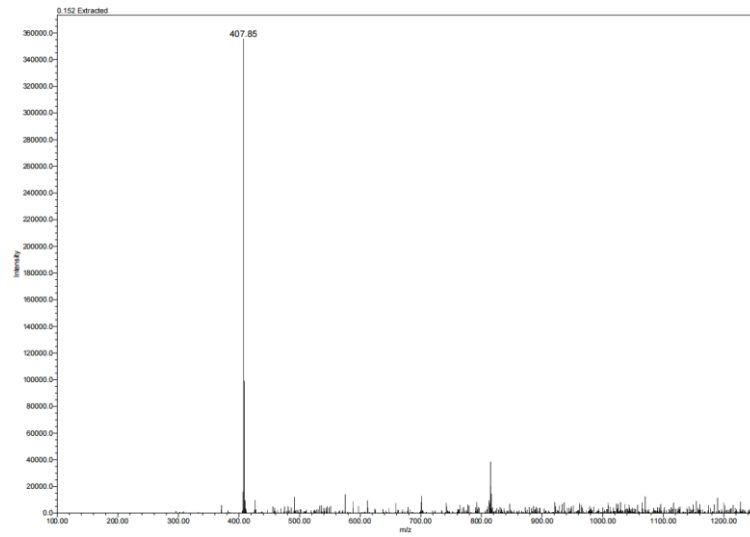

#### 4. HPLC analysis for target compounds

##### Compound I-1

###### Result

|   | Ret. Time | Area    | Rel. Area (%) |
|---|-----------|---------|---------------|
| 1 | 8.232     | 52715   | 1.85          |
| 2 | 8.6       | 81430   | 2.85          |
| 3 | 8.86      | 2721148 | 95.3          |

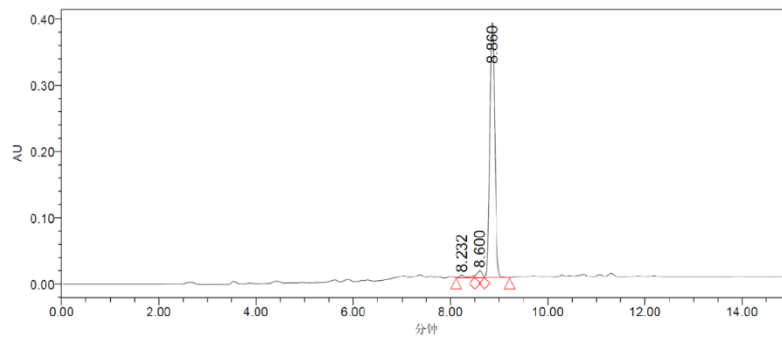

##### Compound I-2

###### Result

|   | Ret. Time | Area     | Rel. Area (%) |
|---|-----------|----------|---------------|
| 1 | 5.948     | 55431431 | 95.72         |
| 2 | 6.633     | 2481496  | 4.28          |

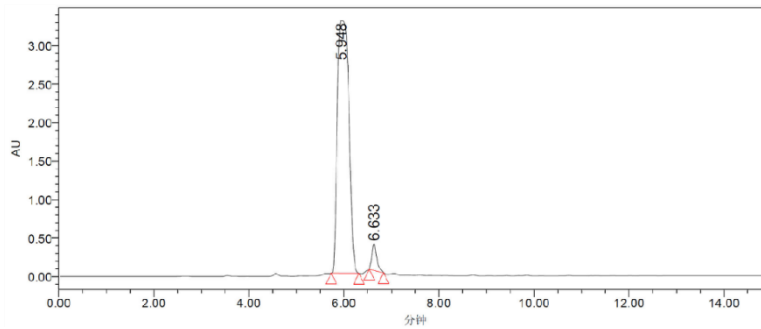



### Compound I-3

#### Result

|   | Ret. Time | Area     | Rel. Area (%) |
|---|-----------|----------|---------------|
| 1 | 4.869     | 127630   | 0.96          |
| 2 | 5.522     | 97082    | 0.73          |
| 3 | 6.241     | 12802185 | 96.64         |
| 4 | 6.727     | 100173   | 0.76          |
| 5 | 7.615     | 120128   | 0.91          |

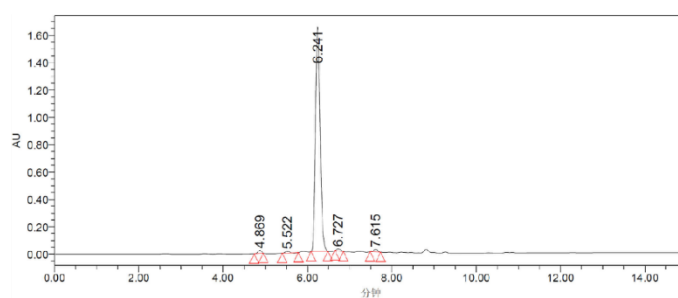

### Compound I-4

#### Result

|   | Ret. Time | Area     | Rel. Area (%) |
|---|-----------|----------|---------------|
| 1 | 7.071     | 80589    | 0.43          |
| 2 | 7.39      | 18131720 | 96.22         |
| 3 | 7.747     | 291545   | 1.55          |
| 4 | 7.96      | 340022   | 1.8           |

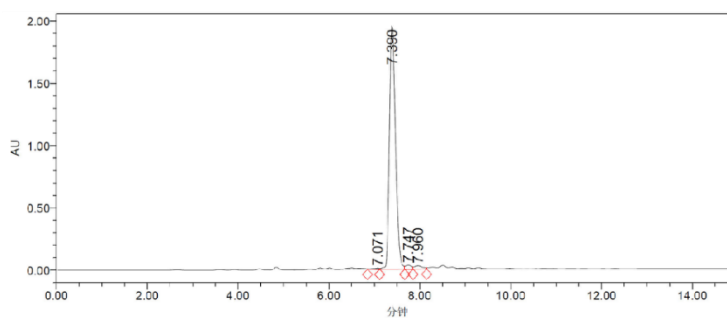

### Compound I-5

#### Result

|   | Ret. Time | Area     | Rel. Area (%) |
|---|-----------|----------|---------------|
| 1 | 7.261     | 17763681 | 97.45         |
| 2 | 8.004     | 465606   | 2.55          |

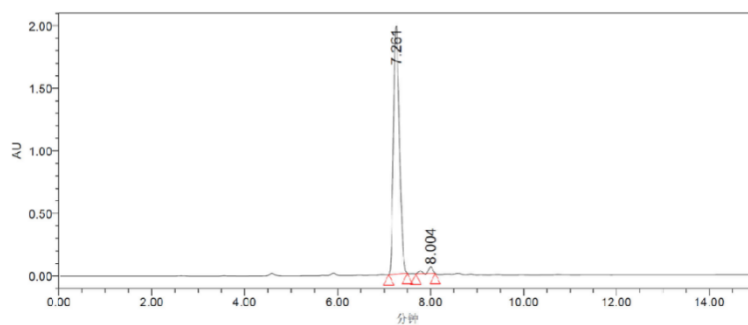

### Compound I-6

#### Result

|   | Ret. Time | Area     | Rel. Area (%) |
|---|-----------|----------|---------------|
| 1 | 5.927     | 580374   | 1.12          |
| 2 | 6.264     | 49847386 | 96.5          |
| 3 | 7.108     | 596980   | 1.16          |
| 4 | 7.338     | 630957   | 1.22          |

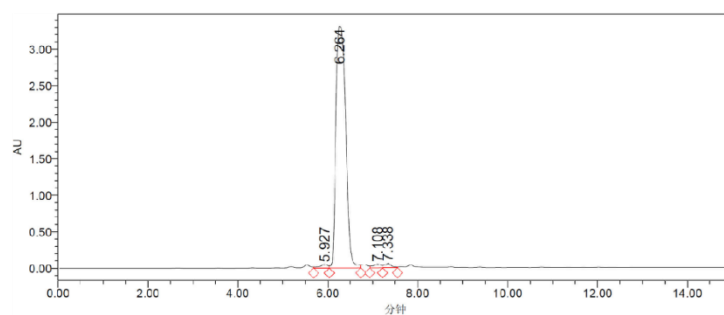

### Compound I-7

#### Result

|   | Ret. Time | Area     | Rel. Area (%) |
|---|-----------|----------|---------------|
| 1 | 6.365     | 53760    | 0.48          |
| 2 | 6.618     | 2550     | 0.02          |
| 3 | 6.915     | 118437   | 1.05          |
| 4 | 7.695     | 10938125 | 96.74         |
| 5 | 7.973     | 193868   | 1.71          |

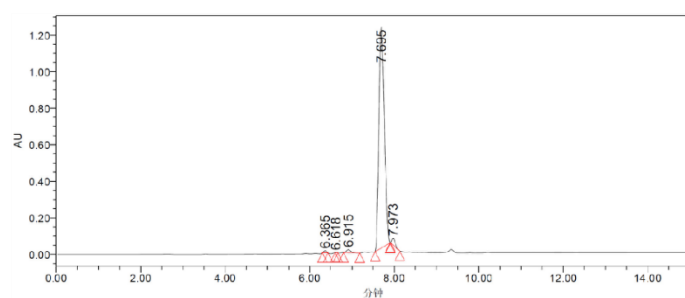

### Compound I-8

#### Result

|   | Ret. Time | Area     | Rel. Area (%) |
|---|-----------|----------|---------------|
| 1 | 5.541     | 113418   | 0.83          |
| 2 | 6.265     | 13332173 | 97.29         |
| 3 | 6.738     | 138315   | 1.01          |
| 4 | 7.548     | 119413   | 0.87          |

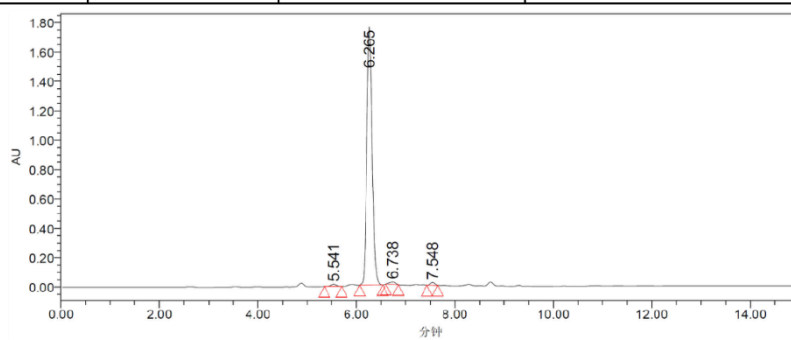

### Compound I-9

#### Result

|   | Ret. Time | Area     | Rel. Area (%) |
|---|-----------|----------|---------------|
| 1 | 6.061     | 803336   | 2.74          |
| 2 | 7.35      | 28183458 | 96.17         |
| 3 | 7.661     | 317647   | 1.08          |

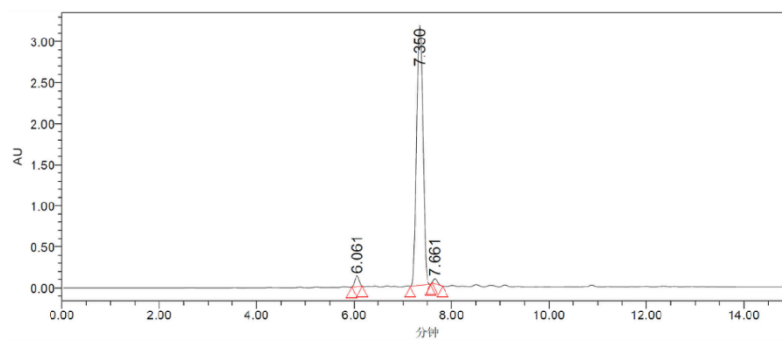

### Compound I-10

#### Result

|   | Ret. Time | Area    | Rel. Area (%) |
|---|-----------|---------|---------------|
| 1 | 6.806     | 140404  | 1.83          |
| 2 | 7.185     | 7526950 | 98.17         |

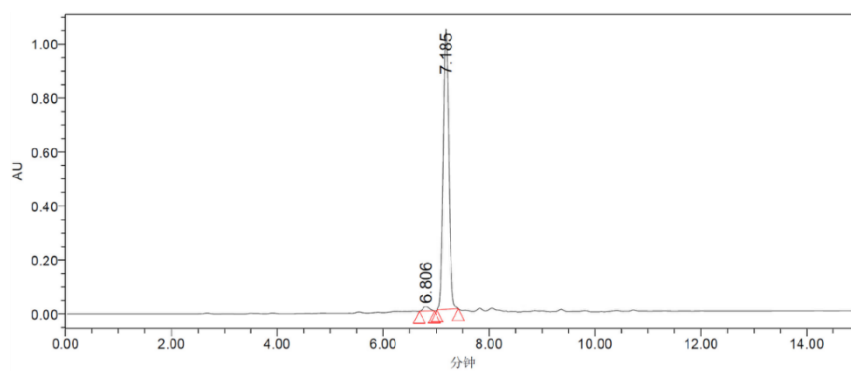

### Compound I-11

#### Result

|   | Ret. Time | Area     | Rel. Area (%) |
|---|-----------|----------|---------------|
| 1 | 6.012     | 47594008 | 96.01         |
| 2 | 6.656     | 1975372  | 3.99          |

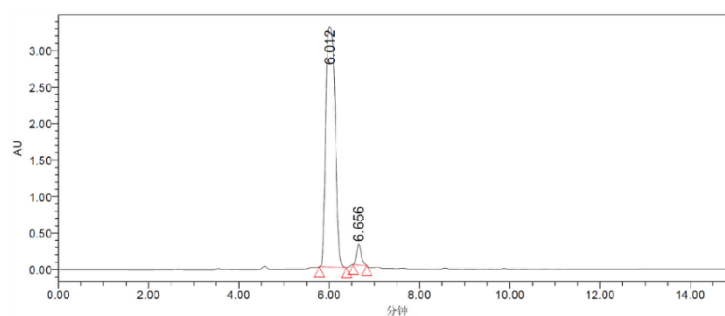

### Compound I-12

#### Result

|   | Ret. Time | Area     | Rel. Area (%) |
|---|-----------|----------|---------------|
| 1 | 7.747     | 11145736 | 95.54         |
| 2 | 10.733    | 520194   | 4.46          |

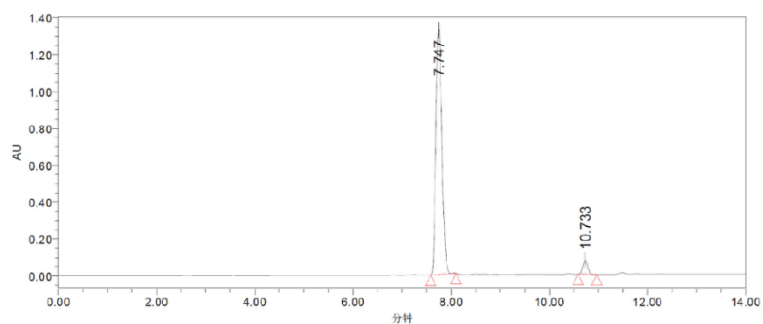

### Compound I-13

#### Result

|   | Ret. Time | Area    | Rel. Area (%) |
|---|-----------|---------|---------------|
| 1 | 6.933     | 16293   | 0.21          |
| 2 | 7.435     | 7652243 | 99.32         |
| 3 | 7.965     | 2607    | 0.03          |
| 4 | 8.172     | 33171   | 0.43          |

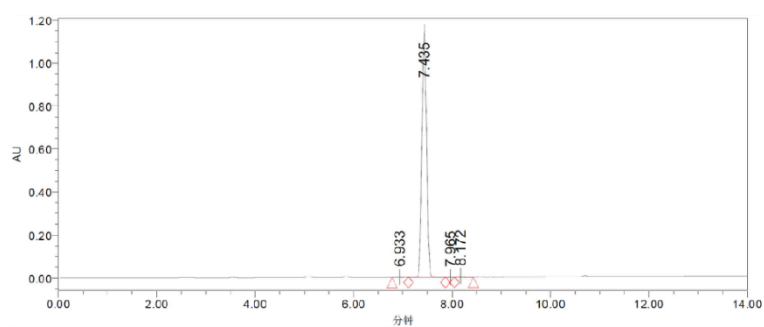

### Compound I-14

#### Result

|   | Ret. Time | Area     | Rel. Area (%) |
|---|-----------|----------|---------------|
| 1 | 8.456     | 24552481 | 97.05         |
| 2 | 10.68     | 745183   | 2.95          |

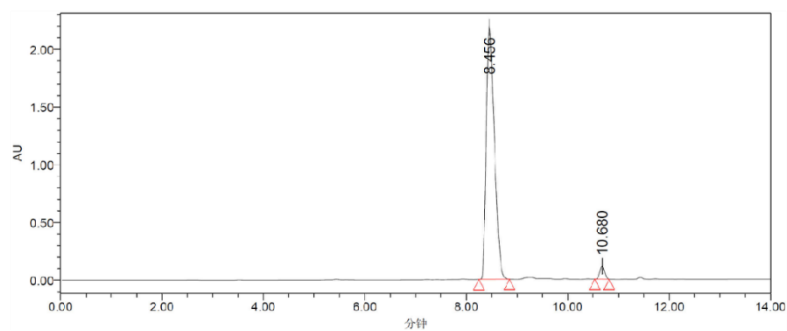

## Compound I-15

### Result

|   | Ret. Time | Area     | Rel. Area (%) |
|---|-----------|----------|---------------|
| 1 | 4.981     | 4194     | 0.03          |
| 2 | 5.457     | 62518    | 0.41          |
| 3 | 5.8       | 124360   | 0.81          |
| 4 | 6.087     | 14947789 | 97.66         |
| 5 | 6.627     | 124493   | 0.81          |
| 6 | 7.019     | 14154    | 0.09          |
| 7 | 7.264     | 28478    | 0.19          |

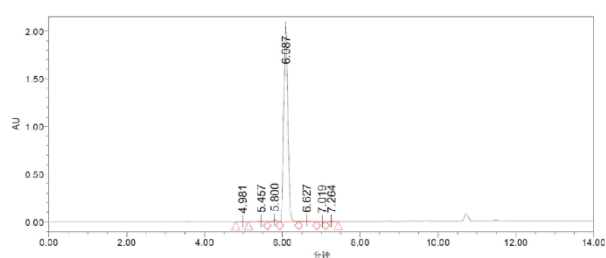

## Compound I-16

### Result

|   | Ret. Time | Area    | Rel. Area (%) |
|---|-----------|---------|---------------|
| 1 | 6.59      | 2548    | 0.04          |
| 2 | 6.988     | 3770    | 0.06          |
| 3 | 7.23      | 43023   | 0.65          |
| 4 | 7.628     | 51274   | 0.77          |
| 5 | 8.066     | 6385534 | 96.13         |
| 6 | 8.617     | 135128  | 2.03          |
| 7 | 8.91      | 21628   | 0.33          |

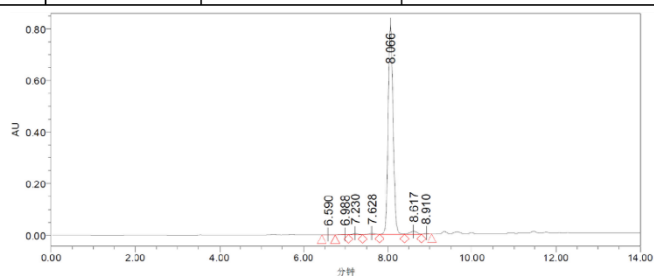

# Compound I-17

## Result

|   | Ret. Time | Area    | Rel. Area (%) |
|---|-----------|---------|---------------|
| 1 | 6.757     | 916     | 0.01          |
| 2 | 7.021     | 9872017 | 99.96         |
| 3 | 7.986     | 2674    | 0.03          |

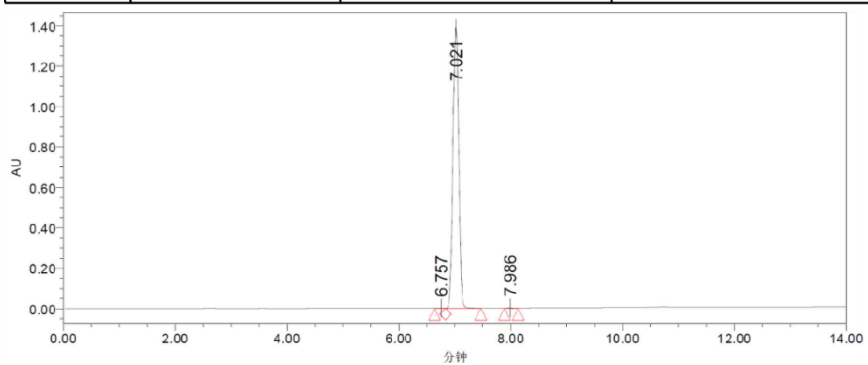



## 5. 2D docking model of I-11

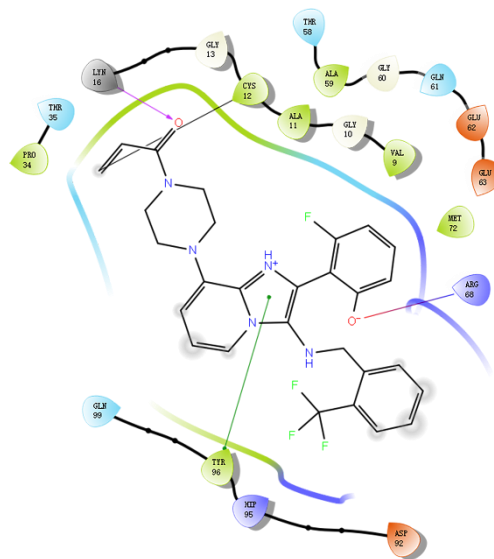

Supplement: d4ob00694a1.pdf [file d4ob00694a1.pdf]
